# Supplementary material for: RNA-Interference-Mediated miR-122-Based Gene Regulation in Colon Cancer, a Structural In Silico Analysis
Source: MDPI journal article supplement (doi:10.3390/ijms232315257), 2022-12-03
Supplement: s1 [file s1]

## Supplementary Material:

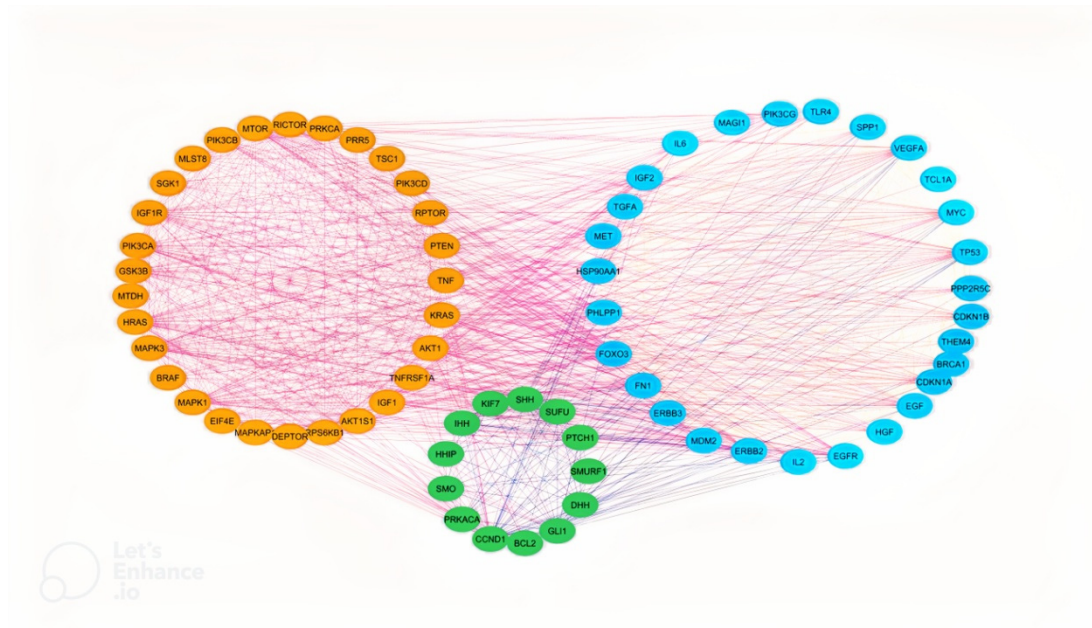

**Figure S1. The integration of genes and proteins associated with miR-122 visualized by Cytoscape 3.8.0 software;** (Orange, spherical nodes- Proteins obtained exclusively from STRING database; Blue, Spherical shaped nodes – Genes obtained solely from GeneMANIA; Green, spherical nodes – Common interactors obtained from both the databases).

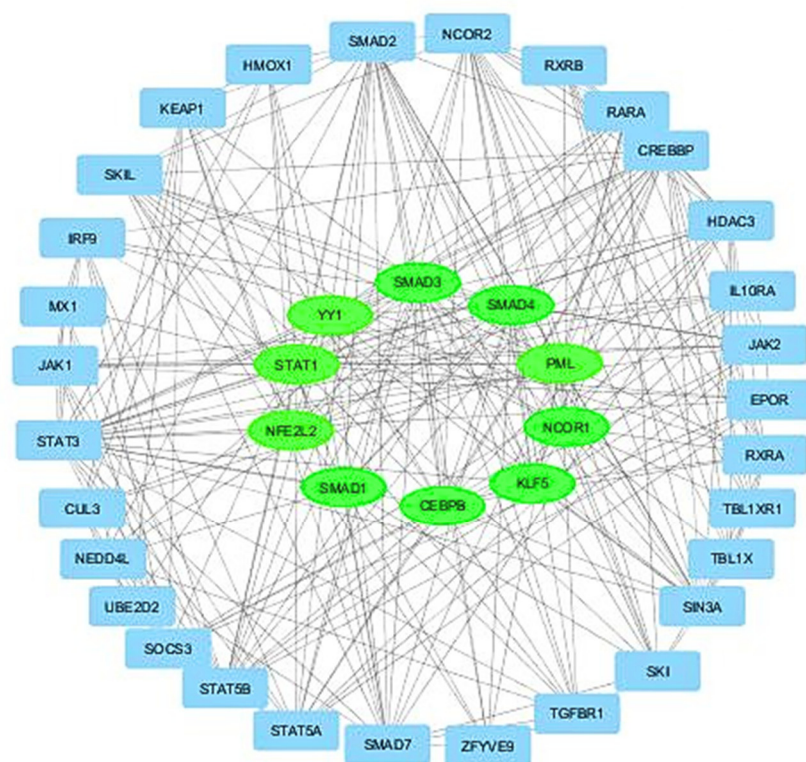

**Figure S2. Predicted transcription factors of miR-122.**

**Table S1. Major interactors of miR-122**

| <b>Gene name / Protein name</b>                                      | <b>Gene symbol</b> | <b>UniProt ID</b> | <b>Interaction detection method</b>                                                                | <b>Source / Reference</b>            |
|----------------------------------------------------------------------|--------------------|-------------------|----------------------------------------------------------------------------------------------------|--------------------------------------|
| Acetoacetyl-CoA Synthetase                                           | <i>AACS</i>        | Q86V21            | Luciferase reporter assay, qRT-PCR                                                                 | Mirtarbase, Tarbase                  |
| ABL Proto-Oncogene 2                                                 | <i>ABL2</i>        | P42684            | HITS-CLIP                                                                                          | Mirtarbase, Tarbase                  |
| A disintegrin and metalloprotease 17                                 | <i>ADAM17</i>      | P78536            | Luciferase reporter assay, qRT-PCR                                                                 | Mirtarbase, Tarbase                  |
| Aldolase, Fructose-Bisphosphate A                                    | <i>ALDOA</i>       | P04075            | qRT-PCR, Dual-luciferase assay<br>Northern blot                                                    | Li et al., 2019; Mirtarbase, Tarbase |
| Adaptor Related Protein Complex 3 Subunit Mu 2                       | <i>AP3M2</i>       | P53677            | Luciferase reporter assay, qRT-PCR                                                                 | Mirtarbase, Tarbase                  |
| ATPase Na <sup>+</sup> /K <sup>+</sup> Transporting Subunit Alpha 2) | <i>ATPIA2</i>      | P50993            | Luciferase reporter assay, qRT-PCR                                                                 | Mirtarbase, Tarbase                  |
| BTB Domain And CNC Homolog 1                                         | <i>BACH1</i>       | O14867            | HITS-CLIP                                                                                          | Tarbase                              |
| BTB Domain And CNC Homolog 2                                         | <i>BACH2</i>       | Q9BYV9            | qRT-PCR                                                                                            | Mirtarbase, Tarbase                  |
| BCL2 Like 2                                                          | <i>BCL2L2</i>      | Q92843            | Immunohistochemistry, Luciferase reporter assay, Microarray, qRT-PCR, Reporter assay, Western blot | Mirtarbase, Tarbase                  |
| Cyclin G1                                                            | <i>CCNG1</i>       | P51959            | qRT-PCR, qRT-PCR, Reporter assay, Western blot                                                     | Asadi et al., 2019,                  |
| Copper Chaperone For Superoxide Dismutase                            | <i>CCS</i>         | O14618            | Proteomics                                                                                         | Mirtarbase, Tarbase                  |
| Cyclin Dependent Kinase 6                                            | <i>CDK6</i>        | P49336            | qRT-PCR                                                                                            | Malayaperumal et al., 2020           |
| Claudin 18                                                           | <i>CLDN18</i>      | P56856            | qRT-PCR                                                                                            | Mirtarbase, Tarbase                  |
| Cut Like Homeobox 1                                                  | <i>CUTL1</i>       | P39880            | qRT-PCR                                                                                            | Mirtarbase, Tarbase                  |
| Dual Specificity Phosphatase 2                                       | <i>DUSP2</i>       | Q05923            | Luciferase reporter assay, qRT-PCR                                                                 | Mirtarbase, Tarbase                  |
| Ectonucleoside Triphosphate                                          | <i>ENTPD4</i>      | Q9Y227            | Luciferase reporter assay, qRT-PCR                                                                 | Mirtarbase, Tarbase                  |

|                                                           |                 |        |                                                  |                                     |
|-----------------------------------------------------------|-----------------|--------|--------------------------------------------------|-------------------------------------|
| Diphosphohydrolase 4                                      |                 |        |                                                  |                                     |
| FA Complementation Group M                                | <i>FANCM</i>    | Q8IYD8 | Biotin-Microarrays                               | Tarbase                             |
| Forkhead Box J3                                           | <i>FOXJ3</i>    | Q8BUR3 | Luciferase reporter assay, qRT-PCR               | Mirtarbase, Tarbase                 |
| Forkhead Box P1                                           | <i>FOXP1</i>    | Q9H334 | Luciferase reporter assay, qRT-PCR               | Mirtarbase, Tarbase                 |
| FUN14 Domain Containing 2                                 | <i>FUNDC2</i>   | Q9BWH2 | Luciferase reporter assay, qRT-PCR               | Mirtarbase, Tarbase                 |
| Glucose-6-Phosphatase Catalytic Subunit 3                 | <i>G6PC3</i>    | Q9BUM1 | Luciferase reporter assay, Microarray, QRT-PCR   | Mirtarbase, Tarbase                 |
| General Transcription Factor IIB                          | <i>GTF2B</i>    | Q00403 | qRT-PCR                                          | Mirtarbase, Tarbase                 |
| Glycogen Synthase 1                                       | <i>GYS1</i>     | P13807 | Microarray, Northern blot, qRT-PCR, Western blot | Mirtarbase, Tarbase                 |
| Interleukin 1 Receptor Type 1                             | <i>IL1R1</i>    | P13504 | HITS-CLIP                                        | Tarbase                             |
| Interferon Regulatory Factor 9                            | <i>IRF9</i>     | Q00978 | HITS-CLIP                                        | Tarbase                             |
| Laminin Subunit Gamma 1                                   | <i>LAMC1</i>    | P11047 | Microarrays                                      | Tarbase                             |
| Mitogen-Activated Protein Kinase Kinase Kinase 3          | <i>MAP3K3</i>   | Q99759 | qRT-PCR                                          | Mirtarbase, Tarbase                 |
| Mitogen-Activated Protein Kinase 11                       | <i>MAPK11</i>   | Q15759 | Luciferase reporter assay, qRT-PCR               | Mirtarbase, Tarbase                 |
| methyl CpG binding protein 2                              | <i>MeCP2</i>    | P51608 | Luciferase reporter assay, qRT-PCR               | Mirtarbase, Tarbase                 |
| Metadherin                                                | <i>MTDH</i>     | Q86UE4 | qRT-PCR, HITS-CLIP                               | Malayaperumal et al., 2020, Tarbase |
| Neural Cell Adhesion Molecule 1                           | <i>NCAM1</i>    | P13591 | Luciferase reporter assay, Microarray, qRT-PCR   | Mirtarbase, Tarbase                 |
| Nuclear Receptor Corepressor 2                            | <i>NCOR2</i>    | Q9Y618 | Biotin-Microarrays                               | Tarbase                             |
| NDRG Family Member 3                                      | <i>NDRG3</i>    | Q9UGV2 | Microarrays                                      | Tarbase                             |
| Nuclear Factor Of Activated T Cells 1                     | <i>NFATC1</i>   | O95644 | qRT-PCR                                          | Mirtarbase, Tarbase                 |
| Nuclear Factor Of Activated T Cells 2 Interacting Protein | <i>NFATC2IP</i> | Q8NCF5 | Luciferase reporter assay, qRT-PCR               | Mirtarbase, Tarbase                 |
| Nuclear Factor Kappa B                                    | <i>NFKB</i>     | P19838 | qRT-PCR,                                         | Malayaperumal et al.,               |

|                                                                        |                  |            |                                                                                 |                                                    |
|------------------------------------------------------------------------|------------------|------------|---------------------------------------------------------------------------------|----------------------------------------------------|
| Subunit 1                                                              |                  |            | Biotin-Microarrays                                                              | 2020,<br>Mirtarbase, tarbase                       |
| NUMB Like Endocytic Adaptor Protein                                    | <i>NUMBL</i>     | Q9Y6R0     | Luciferase reporter assay, qRT-PCR                                              | Mirtarbase, Tarbase                                |
| ORAI Calcium Release-Activated Calcium Modulator 2                     | <i>ORAI2</i>     | Q96SN7     | HITS-CLIP, PAR-CLIP                                                             | Mirtarbase, Tarbase                                |
| Proliferating Cell Nuclear Antigen                                     | <i>PCNA</i>      | P12004     | qRT-PCR                                                                         | Malayaperumal et al., 2020                         |
| Phosphatidylinositol-4,5-Bisphosphate 3-Kinase Catalytic Subunit Alpha | <i>PI3K</i>      | A0A2P0XJ53 | qRT-PCR                                                                         | Malayaperumal et al., 2020<br>; Asadi et al., 2019 |
| Protein Tyrosine Phosphatase Non-Receptor Type 1                       | <i>PTPN1</i>     | P18031     | qRT-PCR                                                                         | Mirtarbase, Tarbase                                |
| RAD21 Cohesin Complex Component                                        | <i>RAD21</i>     | O60216     | PAR-CLIP                                                                        | Mirtarbase, Tarbase                                |
| Solute Carrier Family 7 Member 1                                       | <i>SLC7A1</i>    | P30825     | Luciferase reporter assay, Northern blot, qRT-PCR, Reporter assay, Western blot | Mirtarbase, Tarbase                                |
| SMAD Family Member 2                                                   | <i>SMAD2</i>     | Q15796     | PAR-CLIP                                                                        | Tarbase                                            |
| Sequestosome 1                                                         | <i>SQSTM1</i>    | Q13501     | HITS-CLIP                                                                       | Tarbase                                            |
| TNF Receptor Superfamily Member 10b                                    | <i>TNFRSF10B</i> | O14763     | HITS-CLIP                                                                       | Tarbase                                            |
| Vav Guanine Nucleotide Exchange Factor 3                               | <i>VAV3</i>      | Q9UKW4     | Biotin-Microarrays                                                              | Tarbase                                            |
| AKT Serine/Threonine Kinase 1                                          | <i>AKT1</i>      | P31749     | qRT-PCR, qPCR, Western Blot                                                     | Malayaperumal et al., 2020;<br>Tarbase             |
| AKT Serine/Threonine Kinase 3                                          | <i>AKT3</i>      | Q9Y243     | Immunoblot, Luciferase reporter assay, qRT-PCR                                  | Mirtarbase, Tarbase                                |
| Bcl-2 Associated X-protein                                             | <i>BAX</i>       | Q07812     | Microarray, Western blot                                                        | Mirtarbase, Tarbase                                |
| Baculoviral IAP Repeat Containing 5                                    | <i>BIRC5</i>     | O15392     | qRT-PCR                                                                         | Mirtarbase, Tarbase                                |

|                                                                        |               |        |                                                              |                     |
|------------------------------------------------------------------------|---------------|--------|--------------------------------------------------------------|---------------------|
| Glycogen Synthase Kinase 3 Beta                                        | <i>GSK3B</i>  | P49841 | HITS-CLIP                                                    | Mirtarbase, Tarbase |
| Mitogen-Activated Protein Kinase 1                                     | <i>MAPK1</i>  | P28482 | qRT-PCR                                                      | Mirtarbase, Tarbase |
| MYC Proto-Oncogene                                                     | <i>MYC</i>    | P01106 | HITS-CLIP, Microarray                                        | Mirtarbase, Tarbase |
| Phosphatidylinositol-4,5-Bisphosphate 3-Kinase Catalytic Subunit Delta | <i>PIK3CD</i> | O00329 | Biotin-Microarrays                                           | Tarbase             |
| Phosphatidylinositol-4,5-Bisphosphate 3-Kinase Catalytic Subunit Gamma | <i>PIK3CG</i> | P48736 | Luciferase Reporter Assay, qPCR, Western Blot                | Tarbase             |
| Phosphoinositide-3-Kinase Regulatory Subunit 2                         | <i>PIK3R2</i> | O00459 | qRT-PCR                                                      | Mirtarbase, Tarbase |
| Rac Family Small GTPase 1                                              | <i>RAC1</i>   | P63000 | Luciferase reporter assay, Microarray, qRT-PCR, Western blot | Mirtarbase, Tarbase |
| Raf-1 Proto-Oncogene                                                   | <i>RAF1</i>   | P04049 | Biotin-Microarrays                                           | Tarbase             |
| Ras Homolog Family Member A                                            | <i>RHOA</i>   | P61586 | qRT-PCR                                                      | Mirtarbase, Tarbase |
| SMAD Family Member 4                                                   | <i>SMAD4</i>  | Q13485 | Biotin-Microarrays                                           | Tarbase             |
| Transforming Growth Factor Beta 1                                      | <i>TGFB1</i>  | P01137 | qRT-PCR                                                      | Mirtarbase, Tarbase |
| Transforming Growth Factor Beta Receptor 1                             | <i>TGFBRI</i> | P36897 | Biotin-Microarrays                                           | Tarbase             |
| AKT Serine/Threonine Kinase 2                                          | <i>AKT2</i>   | Q38898 | qRT-PCR                                                      | Mirtarbase, Tarbase |
| Ankyrin 2                                                              | <i>ANK2</i>   | Q01484 | Luciferase reporter assay, qRT-PCR                           | Mirtarbase, Tarbase |
| Annexin A11                                                            | <i>ANXA11</i> | P50995 | Luciferase reporter assay, Microarray, qRT-PCR               | Mirtarbase, Tarbase |
| A-Raf Proto-Oncogene                                                   | <i>ARAF</i>   | P10398 | qRT-PCR                                                      | Mirtarbase, Tarbase |
| B-Raf Proto-Oncogene                                                   | <i>BRAF</i>   | P15056 | qRT-PCR                                                      | Mirtarbase, Tarbase |
| Chloride Intracellular Channel 4                                       | <i>CLIC4</i>  | Q9Y696 | Luciferase reporter assay, Microarray, PAR-CLIP, qRT-PCR     | Mirtarbase, Tarbase |

|                                                                        |                |        |                                    |                     |
|------------------------------------------------------------------------|----------------|--------|------------------------------------|---------------------|
| CXADR Like Membrane Protein                                            | <i>CLMP</i>    | Q9H6B4 | Microarrays                        | Mirtarbase, Tarbase |
| egl-9 family hypoxia inducible factor 3                                | <i>EGLN3</i>   | Q9H6Z9 | Luciferase reporter assay, qRT-PCR | Mirtarbase, Tarbase |
| Fos Proto-Oncogene                                                     | <i>FOS</i>     | P01100 | qRT-PCR                            | Mirtarbase, Tarbase |
| Jun Proto-Oncogene                                                     | <i>JUN</i>     | P05412 | qRT-PCR                            | Mirtarbase, Tarbase |
| Kirsten rat sarcoma virus                                              | <i>KRAS</i>    | P01116 | qRT-PCR                            | Mirtarbase, Tarbase |
| Mitogen-Activated Protein Kinase 1                                     | <i>MAP2K1</i>  | Q02750 | qRT-PCR                            | Mirtarbase, Tarbase |
| Mitogen-Activated Protein Kinase 12                                    | <i>MAP3K12</i> | Q12852 | qRT-PCR                            | Mirtarbase, Tarbase |
| Mitogen-Activated Protein Kinase 10                                    | <i>MAPK10</i>  | P53779 | qRT-PCR                            | Mirtarbase, Tarbase |
| Mitogen-Activated Protein Kinase 3                                     | <i>MAPK3</i>   | P27361 | qRT-PCR                            | Mirtarbase, Tarbase |
| Mitogen-Activated Protein Kinase 8                                     | <i>MAPK8</i>   | P45983 | qRT-PCR                            | Mirtarbase, Tarbase |
| Mitogen-Activated Protein Kinase 9                                     | <i>MAPK9</i>   | P45984 | qRT-PCR                            | Mirtarbase, Tarbase |
| Meprin A Subunit Alpha                                                 | <i>MEP1A</i>   | Q16819 | qRT-PCR                            | Mirtarbase, Tarbase |
| Phosphatidylinositol-4,5-Bisphosphate 3-Kinase Catalytic Subunit Alpha | <i>PIK3CA</i>  | P42336 | qRT-PCR                            | Mirtarbase, Tarbase |
| Phosphoinositide-3-Kinase Regulatory Subunit 1                         | <i>PIK3R1</i>  | P27986 | qRT-PCR                            | Mirtarbase, Tarbase |
| Phosphoinositide-3-Kinase Regulatory Subunit 3                         | <i>PIK3R3</i>  | Q92569 | qRT-PCR                            | Mirtarbase, Tarbase |
| Phosphoinositide-3-Kinase Regulatory Subunit 5                         | <i>PIK3R5</i>  | Q8WYR1 | qRT-PCR                            | Mirtarbase, Tarbase |
| RAB Interacting Factor                                                 | <i>RABIF</i>   | P47224 | qRT-PCR                            | Mirtarbase, Tarbase |
| Ras Association (RalGDS/AF-6) And Pleckstrin Homology                  | <i>RAPH1</i>   | Q70E73 | HITS-CLIP                          | Tarbase             |



|                                                              |                  |        |                                                                                                                    |                                         |
|--------------------------------------------------------------|------------------|--------|--------------------------------------------------------------------------------------------------------------------|-----------------------------------------|
| Domains 1                                                    |                  |        |                                                                                                                    |                                         |
| Solute Carrier Family 7 Member 11                            | <i>SLC7A11</i>   | Q9UPY5 | Luciferase reporter assay, qRT-PCR                                                                                 | Mirtarbase, Tarbase                     |
| SMAD Family Member 3                                         | <i>SMAD3</i>     | P84022 | qRT-PCR                                                                                                            | Mirtarbase, Tarbase                     |
| transforming growth factor beta 2                            | <i>TGFB2</i>     | P61812 | qRT-PCR                                                                                                            | Mirtarbase, Tarbase                     |
| Tumor Protein P53                                            | <i>TP53</i>      | Q96S44 | qRT-PCR                                                                                                            | Mirtarbase, Tarbase                     |
| Tweety Family Member 3                                       | <i>TTYH3</i>     | Q9C0H2 | qRT-PCR                                                                                                            | Mirtarbase, Tarbase                     |
| Exportin 6                                                   | <i>XPO6</i>      | Q96QU8 | Luciferase reporter assay, qRT-PCR                                                                                 | Mirtarbase, Tarbase                     |
| ATPase Phospholipid Transporting 11A                         | <i>ATP11A</i>    | P98196 | qRT-PCR                                                                                                            | Mirtarbase, Tarbase                     |
| B-cell lymphoma-W                                            | <i>Bcl-W</i>     | Q92843 | qRT-PCR                                                                                                            | Asadi et al., 2019                      |
| cell division cycle 25 homolog A                             | <i>CDC25A</i>    | P30304 | qRT-PCR, Dual-luciferase assay, Biotin-Microarrays                                                                 | Yin et al., 2020 , Tarbase              |
| GalNAc-T10; Polypeptide N-acetylgalactosaminyltransferase 10 | <i>GALNT10</i>   | Q86SR1 | Immunohistochemistry, Immunoprecipitation, In situ hybridization, Luciferase reporter assay, QRT-PCR, Western blot | Mirtarbase, Tarbase                     |
| RAB11 Family Interacting Protein 1                           | <i>RAB11FIP1</i> | Q6WKZ4 | HITS-CLIP, Luciferase reporter assay, qRT-PCR                                                                      | Mirtarbase, Tarbase                     |
| Ras-related protein Rab-6B                                   | <i>RAB6B</i>     | Q9NRW1 | Luciferase reporter assay, qRT-PCR                                                                                 | Mirtarbase, Tarbase                     |
| Sterol O-Acyltransferase 1                                   | <i>SOAT1</i>     | P35610 | CLEAR-CLIP, Microarrays                                                                                            | Tarbase                                 |
| T-Box Transcription Factor 19                                | <i>TBX19</i>     | O60806 | Luciferase reporter assay, qRT-PCR                                                                                 | Mirtarbase, Tarbase                     |
| TPD52 Like 2                                                 | <i>TPD52L2</i>   | O43399 | Luciferase reporter assay, Microarray, qRT-PCR                                                                     | Mirtarbase, Tarbase                     |
| Tribbles Pseudokinase 1                                      | <i>TRIB1</i>     | Q96RU8 | Luciferase reporter assay, qRT-PCR                                                                                 | Mirtarbase, Tarbase                     |
| Tripartite Motif Containing 29                               | <i>TRIM29</i>    | Q14134 | qRT-PCR, Microarray                                                                                                | Asadi et al., 2019' Mirtarbase, Tarbase |
| Ubiquitin Associated Protein 2                               | <i>UBAP2</i>     | Q5T6F2 | Luciferase reporter assay, qRT-PCR                                                                                 | Mirtarbase, Tarbase                     |
| X-linked inhibitor of apoptosis protein                      | <i>XIAP</i>      | P98170 | qRT-PCR, co-immunoprecipitation                                                                                    | Hua et al., 2018                        |



Note: Gene and proteins from STRING database: Orange; GeneMania: Green; Yellow: Common in both STRING and GeneMania; Blue: Genes and proteins not included in the final dataset; Interactors indicated in blue were not shortlisted in the final dataset owing to their absence in either of the primary databases used for initial screening.

**Table S2. Detailed binding site prediction of miR122 and mRNA interactors**

| Mirna id       | Refseq id    | Gene Name                                                              | Gene symbol | Start | End  | No. of pairings | Binding region length | Binding score | Binding energy kcal/mol | Longest Consecutive pairings | Position |
|----------------|--------------|------------------------------------------------------------------------|-------------|-------|------|-----------------|-----------------------|---------------|-------------------------|------------------------------|----------|
| hsa-miR-122-5p | NM_001282426 | Phosphatidylinositol-4,5-Bisphosphate 3-Kinase Catalytic Subunit Gamma | PIK3CG      | 5528  | 5549 | 19              | 21                    | 1             | -23                     | 12                           | 3UTR     |
| hsa-miR-122-3p | NM_178812    | Metadherin                                                             | MTDH        | 4741  | 4776 | 15              | 18                    | 1             | -21.9                   | 13                           | 3UTR     |
| hsa-miR-122-5p | NM_001313943 | Ras Homolog Family Member A                                            | RHOA        | 1063  | 1111 | 15              | 48                    | 1             | -21.3                   | 7                            | 3UTR     |
| hsa-miR-122-5p | NM_178812    | Metadherin                                                             | MTDH        | 3008  | 3026 | 15              | 18                    | 1             | -19.2                   | 8                            | 3UTR     |
| hsa-miR-122-3p | NM_002093    | Glycogen Synthase Kinase 3 Beta                                        | GSK3B       | 4464  | 4501 | 12              | 14                    | 1             | -18.1                   | 12                           | 3UTR     |
| hsa-miR-122-5p | NM_001278618 | Protein Tyrosine Phosphatase Non-Receptor Type 1                       | PTPN1       | 2530  | 2553 | 17              | 23                    | 0.923         | -20.6                   | 7                            | 3UTR     |
| hsa-miR-122-5p | NM_001282426 | Phosphatidylinositol-4,5-Bisphosphate 3-Kinase Catalytic               | PIK3CG      | 6288  | 6306 | 15              | 18                    | 0.923         | -19.5                   | 9                            | 3UTR     |

|                |              |                                                                        |        |      |      |    |    |       |       |    |      |
|----------------|--------------|------------------------------------------------------------------------|--------|------|------|----|----|-------|-------|----|------|
|                |              | Subunit Gamma                                                          |        |      |      |    |    |       |       |    |      |
| hsa-miR-122-5p | NM_178812    | Metadherin                                                             | MTDH   | 4855 | 4872 | 14 | 17 | 0.923 | -19.4 | 8  | 3UTR |
| hsa-miR-122-5p | NM_001278618 | Protein Tyrosine Phosphatase Non-Receptor Type 1                       | PTPN1  | 3077 | 3091 | 13 | 14 | 0.923 | -18.7 | 13 | 3UTR |
| hsa-miR-122-3p | NM_001278618 | Protein Tyrosine Phosphatase Non-Receptor Type 1                       | PTPN1  | 2915 | 2930 | 13 | 15 | 0.923 | -17.9 | 7  | 3UTR |
| hsa-miR-122-5p | NM_002751    | Mitogen-Activated Protein Kinase 11                                    | MAPK11 | 1262 | 1281 | 15 | 19 | 0.846 | -22   | 8  | 3UTR |
| hsa-miR-122-5p | NM_001282426 | Phosphatidylinositol-4,5-Bisphosphate 3-Kinase Catalytic Subunit Gamma | PIK3CG | 5221 | 5244 | 19 | 23 | 0.846 | -20.6 | 8  | 3UTR |
| hsa-miR-122-5p | NM_001282426 | Phosphatidylinositol-4,5-Bisphosphate 3-Kinase Catalytic Subunit Gamma | PIK3CG | 3899 | 3916 | 14 | 17 | 0.846 | -20   | 6  | 3UTR |
| hsa-miR-122-5p | NM_001278618 | Protein Tyrosine Phosphatase Non-Receptor Type 1                       | PTPN1  | 2459 | 2474 | 14 | 15 | 0.846 | -19.7 | 14 | 3UTR |
| hsa-miR-122-3p | NM_178812    | Metadherin                                                             | MTDH   | 4338 | 4352 | 13 | 14 | 0.846 | -19.4 | 13 | 3UTR |
| hsa-miR-122-5p | NM_005359    | SMAD Family Member 4                                                   | SMAD4  | 3600 | 3653 | 19 | 33 | 0.846 | -19.4 | 10 | 3UTR |
| hsa-miR-122-5p | NM_002467    | MYC Proto-Oncogene                                                     | MYC    | 2646 | 2666 | 17 | 20 | 0.846 | -18.9 | 13 | 3UTR |
| hsa-miR-122-3p | NM_001282426 | Phosphatidylinositol-4,5-Bisphosphate 3-                               | PIK3CG | 3940 | 3967 | 14 | 17 | 0.846 | -18.7 | 9  | 3UTR |

|                 |              |                                                  |        |      |      |    |    |       |       |    |     |
|-----------------|--------------|--------------------------------------------------|--------|------|------|----|----|-------|-------|----|-----|
|                 |              | Kinase Catalytic Subunit Gamma                   |        |      |      |    |    |       |       |    |     |
| hsa-miR-122b-3p | NM_001077261 | Nuclear Receptor Corepressor 2                   | NCOR2  | 2961 | 2976 | 13 | 15 | 0.961 | -20.2 | 9  | CDS |
| hsa-miR-122-5p  | NM_181690    | AKT Serine/Threonine Kinase 3                    | AKT3   | 990  | 1043 | 20 | 34 | 0.923 | -24.5 | 8  | CDS |
| hsa-miR-122-5p  | NM_002093    | Glycogen Synthase Kinase 3 Beta                  | GSK3B  | 1441 | 1474 | 20 | 33 | 0.923 | -23.2 | 10 | CDS |
| hsa-miR-122-5p  | NM_004612    | Transforming Growth Factor Beta Receptor 1       | TGFBR1 | 1177 | 1201 | 19 | 24 | 0.846 | -23.6 | 12 | CDS |
| hsa-miR-122-5p  | NM_001313943 | Ras Homolog Family Member A                      | RHOA   | 683  | 706  | 16 | 23 | 0.846 | -19.8 | 8  | CDS |
| hsa-miR-122-5p  | NM_005359    | SMAD Family Member 4                             | SMAD4  | 1042 | 1061 | 17 | 19 | 0.846 | -19.4 | 14 | CDS |
| hsa-miR-122-5p  | NM_001206654 | Nuclear Receptor Corepressor 2                   | NCOR2  | 596  | 642  | 16 | 21 | 0.846 | -19.1 | 10 | CDS |
| hsa-miR-122-5p  | NM_001306210 | Transforming Growth Factor Beta Receptor 1       | TGFBR1 | 1189 | 1213 | 19 | 24 | 0.846 | -18.6 | 12 | CDS |
| hsa-miR-122b-3p | NM_005163    | AKT Serine/Threonine Kinase 1                    | AKT1   | 1536 | 1553 | 15 | 17 | 0.846 | -17.5 | 12 | CDS |
| hsa-miR-122-5p  | NM_138957    | Mitogen-Activated Protein Kinase 1               | MAPK1  | 806  | 829  | 16 | 23 | 0.846 | -17.2 | 6  | CDS |
| hsa-miR-122b-5p | NM_005163    | AKT Serine/Threonine Kinase 1                    | AKT1   | 1298 | 1323 | 15 | 20 | 0.846 | -17   | 8  | CDS |
| hsa-miR-122-5p  | NM_001278618 | Protein Tyrosine Phosphatase Non-Receptor Type 1 | PTPN1  | 677  | 701  | 19 | 24 | 0.846 | -16.7 | 12 | CDS |

|                |              |                                 |       |      |      |    |    |       |       |    |     |
|----------------|--------------|---------------------------------|-------|------|------|----|----|-------|-------|----|-----|
| hsa-miR-122-5p | NM_001077261 | Nuclear Receptor Corepressor 2  | NCOR2 | 622  | 642  | 16 | 20 | 0.846 | -16.5 | 10 | CDS |
| hsa-miR-122-3p | NM_002093    | Glycogen Synthase Kinase 3 Beta | GSK3B | 1779 | 1802 | 13 | 17 | 0.846 | -16.3 | 11 | CDS |
| hsa-miR-122-5p | NM_001313943 | Ras Homolog Family Member A     | RHOA  | 382  | 402  | 18 | 20 | 0.846 | -15.1 | 9  | CDS |

**Table S3. Analysis of major miR-122 interactors**

| <i>in silico</i> tool used | Purpose                           | Results                                           |                   | Reference |
|----------------------------|-----------------------------------|---------------------------------------------------|-------------------|-----------|
| PANTHER                    | Determination of Protein classes  | <b>Parameters Analysed</b>                        | <b>Percentage</b> | Figure 3  |
|                            |                                   | Protein Modifying Enzyme                          | 25%               |           |
|                            |                                   | Transporter                                       | 11%               |           |
|                            |                                   | Scaffold / Adaptor protein                        | 3%                |           |
|                            |                                   | Membrane Traffic protein                          | 1%                |           |
|                            |                                   | Cell Junction Protein                             | 1%                |           |
|                            |                                   | Protein- binding activity modulator               | 9%                |           |
|                            |                                   | Nucleic Acid Metabolism Protein                   | 6%                |           |
|                            |                                   | Transmembrane Signal Receptor                     | 8%                |           |
|                            |                                   | Calcium-binding protein                           | 1%                |           |
|                            |                                   | Extracellular matrix protein                      | 2%                |           |
|                            |                                   | Intercellular signal molecule                     | 2%                |           |
|                            |                                   | Gene-specific transcriptional regulator           | 14%               |           |
|                            |                                   | Metabolite interconversion enzyme                 | 15%               |           |
|                            |                                   | Chromatin/chromatin-binding or regulatory protein | 2%                |           |
| DAVID 6.8 online tool      | Determination of Overall pathways | <b>Parameters Analysed</b>                        | <b>Percentage</b> | Figure 4  |
|                            |                                   | Colorectal cancer pathways                        | 12%               |           |

|                               |                                                                      |                                                                                                                                                                                                                                                                                            |       |                   |
|-------------------------------|----------------------------------------------------------------------|--------------------------------------------------------------------------------------------------------------------------------------------------------------------------------------------------------------------------------------------------------------------------------------------|-------|-------------------|
|                               |                                                                      | Pancreatic cancer                                                                                                                                                                                                                                                                          | 9%    |                   |
|                               |                                                                      | Osteoclast differentiation                                                                                                                                                                                                                                                                 | 10%   |                   |
|                               |                                                                      | Hepatitis B                                                                                                                                                                                                                                                                                | 10%   |                   |
|                               |                                                                      | B cell receptor signalling pathway                                                                                                                                                                                                                                                         | 8%    |                   |
|                               |                                                                      | Neurotrophin signalling pathway                                                                                                                                                                                                                                                            | 10%   |                   |
|                               |                                                                      | Chronic myeloid leukemia                                                                                                                                                                                                                                                                   | 8%    |                   |
|                               |                                                                      | T cell receptor signalling pathway                                                                                                                                                                                                                                                         | 9%    |                   |
|                               |                                                                      | Fox O signalling pathway                                                                                                                                                                                                                                                                   | 10%   |                   |
|                               |                                                                      | Pathways in cancer                                                                                                                                                                                                                                                                         | 14%   |                   |
| DAVID – KEGG Pathway analysis | Identification of genes expressed in different stages of CRC pathway | Total number of genes from the geneset to be present in the KEGG pathway analysis is Twenty Eight. The genes were expressed in normal epithelium and in different stages if cancer progression including Dysplastic ACF, Early adenoma, intermediate adenoma, late adenoma, and carcinoma. |       | Figure 5          |
| Enrichr                       | Identification of top 10 transcription factors in the gene set       | STAT1, PML, YY1, NFE2L2, SMAD1, SMAD3, SMAD4, NCOR1, CEBPB, KLF5                                                                                                                                                                                                                           |       | Figure 6          |
| FunRich                       | Functional Enrichment Analysis of gene set                           | <b>Parameters Analysed</b>                                                                                                                                                                                                                                                                 |       | <b>Percentage</b> |
|                               |                                                                      | <b>A. Sub-cellular localization</b>                                                                                                                                                                                                                                                        |       | Figure 7a.        |
|                               |                                                                      | Nucleus                                                                                                                                                                                                                                                                                    | 62.2% |                   |
|                               |                                                                      | Activity responsive factor complex                                                                                                                                                                                                                                                         | 2.4%  |                   |
|                               |                                                                      | Microtubule cytoskeleton                                                                                                                                                                                                                                                                   | 4.9%  |                   |
|                               |                                                                      | Cytosol                                                                                                                                                                                                                                                                                    | 28%   |                   |
|                               |                                                                      | Cytoplasm                                                                                                                                                                                                                                                                                  | 62.2% |                   |
|                               |                                                                      | <b>B. Biological Process</b>                                                                                                                                                                                                                                                               |       | Figure 7b.        |
|                               |                                                                      | Protein targeting                                                                                                                                                                                                                                                                          | 1.1%  |                   |
|                               |                                                                      | Energy pathways                                                                                                                                                                                                                                                                            | 10.3% |                   |
|                               |                                                                      | Protein metabolism                                                                                                                                                                                                                                                                         | 8%    |                   |
|                               |                                                                      | Signal transduction                                                                                                                                                                                                                                                                        | 36.8% |                   |
|                               |                                                                      | Cell communication                                                                                                                                                                                                                                                                         | 34.5% |                   |

|  |  |                                          |       |            |
|--|--|------------------------------------------|-------|------------|
|  |  | <b>C. Molecular Function</b>             |       | Figure 7c. |
|  |  | Transcription factor activity            | 10.2% |            |
|  |  | Transmembrane receptor activity          | 2.3%  |            |
|  |  | RNA binding                              | 1.1%  |            |
|  |  | DNA binding                              | 1.1%  |            |
|  |  | Protein serine/threonine kinase activity | 10.2% |            |
|  |  | Kinase regulator activity                | 2.3%  |            |
|  |  | Lipid kinase activity                    | 2.3%  |            |
|  |  | ATPase activity                          | 3.4%  |            |
|  |  | <b>D. Transcription factor</b>           |       | Figure 7d. |
|  |  | KLF7                                     |       |            |
|  |  | SP4                                      |       |            |
|  |  | SP1                                      |       |            |
|  |  | MYC                                      |       |            |
|  |  | SMAD1                                    |       |            |
|  |  | YY1                                      |       |            |
|  |  | STAT1                                    |       |            |
|  |  | <b>E. Site of expression</b>             |       | Figure 7e. |
|  |  | Cervical cancer                          | 65.9% |            |
|  |  | Colorectal cancer                        | 63.6% |            |
|  |  | Colorectal cancer cells                  | 9.1%  |            |
|  |  | Spleen                                   | 72.7% |            |
|  |  | Soft tissue                              | 64.8% |            |
|  |  | Malignant lymphoma                       | 62.5% |            |
|  |  | Testis cancer                            | 65.9% |            |
|  |  | Prostate cancer                          | 64.8% |            |
|  |  | <b>F. Clinical Phenotype</b>             |       | Figure 7f. |
|  |  | Muscle, Soft tissue                      | 26.7% |            |

|                                               |                                                        |                                                                                                |              |            |                              |                                |                 |          |
|-----------------------------------------------|--------------------------------------------------------|------------------------------------------------------------------------------------------------|--------------|------------|------------------------------|--------------------------------|-----------------|----------|
|                                               |                                                        | Gastrointestinal                                                                               |              |            |                              |                                | 13.3%           |          |
|                                               |                                                        | Small cavum septum                                                                             |              |            |                              |                                | 13.3%           |          |
|                                               |                                                        | Recurrent rectal bleeding                                                                      |              |            |                              |                                | 6.7%            |          |
|                                               |                                                        | Tumors leaving pitting scars                                                                   |              |            |                              |                                | 6.7%            |          |
|                                               |                                                        | Colon cancer                                                                                   |              |            |                              |                                | 6.7%            |          |
|                                               |                                                        | Oncology                                                                                       |              |            |                              |                                | 20%             |          |
| Cytoscape 3.8.0. software (Cytohubba plug-in) | Identification of major hub genes                      | AKT1, MAPK1, MYC, GSK3B, SMAD4, RHOA, AKT3, MAPK11, PTPN1, PIK3R2, NCOR2, TGFBR1, PIK3CG, MTDH |              |            |                              |                                |                 | Figure 8 |
| MiRWalk 2.0 database                          | Binding site prediction of miR122 and Hub genes (mRNA) | <b>Gene Symbol</b>                                                                             | <b>Start</b> | <b>End</b> | <b>Binding region length</b> | <b>Binding energy kcal/mol</b> | <b>Position</b> | Table 2  |
|                                               |                                                        | MTDH                                                                                           | 4741         | 4776       | 18                           | -21.9                          | 3UTR            |          |
|                                               |                                                        |                                                                                                | 3008         | 3026       | 18                           | -19.2                          | 3UTR            |          |
|                                               |                                                        |                                                                                                | 4855         | 4872       | 17                           | -19.4                          | 3UTR            |          |
|                                               |                                                        |                                                                                                | 4338         | 4352       | 14                           | -19.4                          | 3UTR            |          |
|                                               |                                                        | PIK3CG                                                                                         | 5528         | 5549       | 21                           | -23                            | 3UTR            |          |
|                                               |                                                        |                                                                                                | 6288         | 6306       | 18                           | -19.5                          | 3UTR            |          |
|                                               |                                                        |                                                                                                | 5221         | 5244       | 23                           | -20.6                          | 3UTR            |          |
|                                               |                                                        |                                                                                                | 3899         | 3916       | 17                           | -20                            | 3UTR            |          |
|                                               |                                                        |                                                                                                | 3940         | 3967       | 17                           | -18.7                          | 3UTR            |          |
|                                               |                                                        | RHOA                                                                                           | 1063         | 1111       | 48                           | -21.3                          | 3UTR            |          |
|                                               |                                                        |                                                                                                | 683          | 706        | 23                           | -19.8                          | CDS             |          |
|                                               |                                                        |                                                                                                | 382          | 402        | 20                           | -15.1                          | CDS             |          |
|                                               |                                                        | GSK3B                                                                                          | 4464         | 4501       | 14                           | -18.1                          | 3UTR            |          |
|                                               |                                                        |                                                                                                | 1441         | 1474       | 33                           | -23.2                          | CDS             |          |
|                                               |                                                        |                                                                                                | 1779         | 1802       | 17                           | -16.3                          | CDS             |          |
|                                               |                                                        | PTPN1                                                                                          | 2530         | 2553       | 23                           | -20.6                          | 3UTR            |          |



|  |  |        |      |      |    |       |      |  |
|--|--|--------|------|------|----|-------|------|--|
|  |  |        | 3077 | 3091 | 14 | -18.7 | 3UTR |  |
|  |  |        | 2915 | 2930 | 15 | -17.9 | 3UTR |  |
|  |  |        | 2459 | 2474 | 15 | -19.7 | 3UTR |  |
|  |  |        | 677  | 701  | 24 | -16.7 | CDS  |  |
|  |  | MAPK11 | 1262 | 1281 | 19 | -22   | 3UTR |  |
|  |  | SMAD4  | 3600 | 3653 | 33 | -19.4 | 3UTR |  |
|  |  |        | 1042 | 1061 | 19 | -19.4 | CDS  |  |
|  |  | MYC    | 2646 | 2666 | 20 | -18.9 | 3UTR |  |
|  |  | NCOR2  | 2961 | 2976 | 15 | -20.2 | CDS  |  |
|  |  |        | 596  | 642  | 21 | -19.1 | CDS  |  |
|  |  |        | 622  | 642  | 20 | -16.5 | CDS  |  |
|  |  | AKT3   | 990  | 1043 | 34 | -24.5 | CDS  |  |
|  |  | TGFB1  | 1177 | 1201 | 24 | -23.6 | CDS  |  |
|  |  |        | 1189 | 1213 | 24 | -18.6 | CDS  |  |
|  |  | AKT1   | 1536 | 1553 | 17 | -17.5 | CDS  |  |
|  |  |        | 1298 | 1323 | 20 | -17   | CDS  |  |
|  |  | MAPK1  | 806  | 829  | 23 | -17.2 | CDS  |  |

**Table S4. Complete list of miR122 interactors**

| No. | Gene Symbol | miRnet Target ID | Experiment used for detection                                          | No.  | Gene Symbol | miRnet Target ID | Experiment used for detection |
|-----|-------------|------------------|------------------------------------------------------------------------|------|-------------|------------------|-------------------------------|
| 1.  | A2M         | 2                | Microarray                                                             | 1077 | LPCAT3      | 10162            | Biotin-Microarrays            |
| 2.  | ABCF1       | 23               | HITS-CLIP//PAR-CLIP                                                    | 1078 | NT5DC3      | 51559            | Microarrays                   |
| 3.  | ABL2        | 27               | HITS-CLIP                                                              | 1079 | SUDS3       | 64426            | Biotin-Microarrays            |
| 4.  | ADAM10      | 102              | Immunohistochemistry//Luciferase reporter assay//qRT-PCR//Western blot | 1080 | FGFR1OP2    | 26127            | Biotin-Microarrays            |
| 5.  | ADCY2       | 108              | HITS-CLIP                                                              | 1081 | RNGTT       | 8732             | Biotin-Microarrays            |
| 6.  | GRK3        | 157              | HITS-CLIP                                                              | 1082 | NCOA7       | 135112           | Biotin-Microarrays            |
| 7.  | ALDOA       | 226              | Luciferase reporter                                                    | 1083 | FBXO9       | 26268            | Biotin-Microarrays            |

|     |         |     |                                                                                                    |      |          |        |                                 |
|-----|---------|-----|----------------------------------------------------------------------------------------------------|------|----------|--------|---------------------------------|
|     |         |     | assay//Northern blot//qRT-PCR                                                                      |      |          |        |                                 |
| 8.  | ALOX5AP | 241 | PAR-CLIP                                                                                           | 1084 | MDN1     | 23195  | Biotin-Microarrays              |
| 9.  | ANG     | 283 | HITS-CLIP                                                                                          | 1085 | ZNF451   | 26036  | Biotin-Microarrays              |
| 10. | ANK2    | 287 | Luciferase reporter assay//qRT-PCR                                                                 | 1086 | BAG2     | 9532   | Biotin-Microarrays              |
| 11. | ANXA7   | 310 | Proteomics                                                                                         | 1087 | E2F3     | 1871   | Biotin-Microarrays              |
| 12. | ANXA11  | 311 | Luciferase reporter assay//Microarray//qRT-PCR                                                     | 1088 | B3GAT2   | 135152 | Biotin-Microarrays              |
| 13. | XIAP    | 331 | HITS-CLIP                                                                                          | 1089 | SOBP     | 55084  | Biotin-Microarrays              |
| 14. | BIRC5   | 332 | PAR-CLIP                                                                                           | 1090 | TRIM38   | 10475  | Biotin-Microarrays              |
| 15. | RHOA    | 387 | Luciferase reporter assay                                                                          | 1091 | PHF1     | 5252   | Microarrays                     |
| 16. | PHOX2A  | 401 | Microarray                                                                                         | 1092 | QKI      | 9444   | HITS-CLIP, Biotin-Microarrays   |
| 17. | ARL2    | 402 | PAR-CLIP                                                                                           | 1093 | ENPP5    | 59084  | Biotin-Microarrays              |
| 18. | ARSA    | 410 | PAR-CLIP                                                                                           | 1094 | BRD8     | 10902  | Biotin-Microarrays              |
| 19. | ARSB    | 411 | Microarray                                                                                         | 1095 | LMNB1    | 4001   | Microarrays                     |
| 20. | ART3    | 419 | Microarray                                                                                         | 1096 | LNPEP    | 4012   | Biotin-Microarrays              |
| 21. | ATP1A2  | 477 | Luciferase reporter assay//qRT-PCR                                                                 | 1097 | TRAPPC13 | 80006  | Biotin-Microarrays              |
| 22. | ATP7A   | 538 | Microarray                                                                                         | 1098 | ATP6V0E1 | 8992   | Biotin-Microarrays              |
| 23. | AXL     | 558 | Luciferase reporter assay                                                                          | 1099 | CPEB4    | 80315  | Biotin-Microarrays              |
| 24. | BAX     | 581 | Microarray//Western blot                                                                           | 1100 | ZNF346   | 23567  | Biotin-Microarrays              |
| 25. | BCL2L1  | 598 | qRT-PCR//Western blot                                                                              | 1101 | SMC4     | 10051  | Biotin-Microarrays              |
| 26. | BCL2L2  | 599 | Immunohistochemistry//Luciferase reporter assay//Microarray//qRT-PCR//Reporter assay//Western blot | 1102 | BCL6     | 604    | Biotin-Microarrays              |
| 27. | BPGM    | 669 | Microarray                                                                                         | 1103 | KPNA1    | 3836   | HITS-CLIP                       |
| 28. | BRCA2   | 675 | Microarray                                                                                         | 1104 | ARMC8    | 25852  | Biotin-Microarrays              |
| 29. | C3      | 718 | HITS-CLIP                                                                                          | 1105 | SLC25A36 | 55186  | Biotin-Microarrays              |
| 30. | CALD1   | 800 | Proteomics                                                                                         | 1106 | COL7A1   | 1294   | Biotin-Microarrays, Microarrays |
| 31. | CALM3   | 808 | PAR-CLIP                                                                                           | 1107 | PRKAR2A  | 5576   | Biotin-Microarrays              |
| 32. | CALR    | 811 | Proteomics                                                                                         | 1108 | USP4     | 7375   | Biotin-Microarrays              |
| 33. | CALU    | 813 | Proteomics                                                                                         | 1109 | TUSC2    | 11334  | Microarrays                     |

|     |         |      |                                                              |      |          |       |                                 |
|-----|---------|------|--------------------------------------------------------------|------|----------|-------|---------------------------------|
| 34. | CASP7   | 840  | Microarray                                                   | 1110 | FXR1     | 8087  | Biotin-Microarrays              |
| 35. | CCNG1   | 900  | qRT-PCR//Reporter assay//Western blot                        | 1111 | BBX      | 56987 | PAR-CLIP, Biotin-Microarrays    |
| 36. | SIGLEC6 | 946  | PAR-CLIP                                                     | 1112 | PLXNA1   | 5361  | Biotin-Microarrays              |
| 37. | ENTPD1  | 953  | HITS-CLIP                                                    | 1113 | PLSCR4   | 57088 | Microarrays                     |
| 38. | CDK4    | 1019 | HITS-CLIP//Reporter assay                                    | 1114 | MAPKAPK3 | 7867  | Biotin-Microarrays              |
| 39. | CENPF   | 1063 | Proteomics                                                   | 1115 | ZBTB47   | 92999 | Biotin-Microarrays              |
| 40. | CEACAM8 | 1088 | Microarray                                                   | 1116 | NKTR     | 4820  | Biotin-Microarrays              |
| 41. | AP1S1   | 1174 | PAR-CLIP                                                     | 1117 | NEK4     | 6787  | Biotin-Microarrays              |
| 42. | CCR6    | 1235 | HITS-CLIP                                                    | 1118 | INO80D   | 54891 | Biotin-Microarrays              |
| 43. | CNN3    | 1266 | Proteomics                                                   | 1119 | GTF3C2   | 2976  | Microarrays                     |
| 44. | COL13A1 | 1305 | HITS-CLIP                                                    | 1120 | IFIH1    | 64135 | Microarrays                     |
| 45. | COPA    | 1314 | PAR-CLIP                                                     | 1121 | SPTBN1   | 6711  | Biotin-Microarrays              |
| 46. | SLC31A1 | 1317 | HITS-CLIP                                                    | 1122 | USP34    | 9736  | Biotin-Microarrays              |
| 47. | CPA3    | 1359 | Microarray                                                   | 1123 | IL1R1    | 3554  | HITS-CLIP                       |
| 48. | CREB1   | 1385 | Luciferase reporter assay//Microarray//qRT-PCR//Western blot | 1124 | IL1R1    | 3554  | Biotin-Microarrays              |
| 49. | CS      | 1431 | PAR-CLIP                                                     | 1125 | HDLBP    | 3069  | CLEAR-CLIP                      |
| 50. | CSRP1   | 1465 | Microarray                                                   | 1126 | ID2      | 3398  | Biotin-Microarrays              |
| 51. | CTPS1   | 1503 | Microarray                                                   | 1127 | PLEKHB2  | 55041 | Biotin-Microarrays, Microarrays |
| 52. | CYP3A5  | 1577 | PAR-CLIP                                                     | 1128 | PRKD3    | 23683 | Biotin-Microarrays              |
| 53. | CYP7A1  | 1581 | Luciferase reporter assay//qRT-PCR                           | 1129 | SRSF7    | 6432  | Biotin-Microarrays              |
| 54. | DBT     | 1629 | PAR-CLIP                                                     | 1130 | MSH6     | 2956  | Biotin-Microarrays              |
| 55. | DMXL1   | 1657 | Microarray                                                   | 1131 | FARSB    | 10056 | Biotin-Microarrays              |
| 56. | DYNC1H1 | 1778 | Microarray                                                   | 1132 | ALMS1    | 7840  | Biotin-Microarrays              |
| 57. | DUSP2   | 1844 | Luciferase reporter assay//qRT-PCR                           | 1133 | CACYBP   | 27101 | Microarrays                     |
| 58. | ECE1    | 1889 | PAR-CLIP                                                     | 1134 | RALGPS2  | 55103 | Biotin-Microarrays              |
| 59. | EGFR    | 1956 | Luciferase reporter assay//qRT-PCR//Western blot             | 1135 | RPL22    | 6146  | Biotin-Microarrays              |
| 60. | EYA4    | 2070 | Microarray                                                   | 1136 | SRSF4    | 6429  | Biotin-Microarrays              |

|     |          |      |                                                  |      |          |        |                                 |
|-----|----------|------|--------------------------------------------------|------|----------|--------|---------------------------------|
| 61. | F2       | 2147 | HITS-CLIP                                        | 1137 | ASH1L    | 55870  | Biotin-Microarrays              |
| 62. | F2RL1    | 2150 | HITS-CLIP                                        | 1138 | SFPQ     | 6421   | Biotin-Microarrays              |
| 63. | FANCC    | 2176 | HITS-CLIP                                        | 1139 | RHOU     | 58480  | Biotin-Microarrays              |
| 64. | FHL2     | 2274 | PAR-CLIP                                         | 1140 | GON4L    | 54856  | Biotin-Microarrays              |
| 65. | FUT8     | 2530 | Luciferase reporter assay//qRT-PCR//Western blot | 1141 | PRG4     | 10216  | Biotin-Microarrays, Microarrays |
| 66. | G6PC     | 2538 | PAR-CLIP                                         | 1142 | SRSF11   | 9295   | Biotin-Microarrays              |
| 67. | GALNT3   | 2591 | PAR-CLIP                                         | 1143 | APH1A    | 51107  | Microarrays                     |
| 68. | GFPT1    | 2673 | HITS-CLIP                                        | 1144 | NSUN4    | 387338 | Biotin-Microarrays              |
| 69. | B4GALT1  | 2683 | Microarray                                       | 1145 | TMED5    | 50999  | Biotin-Microarrays              |
| 70. | GLUL     | 2752 | PAR-CLIP                                         | 1146 | PRRC2C   | 23215  | Biotin-Microarrays              |
| 71. | GP2      | 2813 | HITS-CLIP//PAR-CLIP                              | 1147 | VAMP4    | 8674   | CLEAR-CLIP                      |
| 72. | FFAR1    | 2864 | PAR-CLIP                                         | 1148 | RSRP1    | 57035  | Biotin-Microarrays, Microarrays |
| 73. | GRSF1    | 2926 | PAR-CLIP                                         | 1149 | KMT2A    | 4297   | Biotin-Microarrays              |
| 74. | GSTM3    | 2947 | Proteomics                                       | 1150 | DDX59    | 83479  | Biotin-Microarrays              |
| 75. | GTF2B    | 2959 | qRT-PCR                                          | 1151 | ATF6     | 22926  | Biotin-Microarrays              |
| 76. | GTF2F1   | 2962 | PAR-CLIP                                         | 1152 | B4GALT6  | 9331   | Biotin-Microarrays              |
| 77. | GTF2H2   | 2966 | Microarray                                       | 1153 | MYB      | 4602   | Biotin-Microarrays, Microarrays |
| 78. | GYS1     | 2997 | Microarray//Northern blot//qRT-PCR//Western blot | 1154 | ALDH8A1  | 64577  | Biotin-Microarrays              |
| 79. | H1F0     | 3005 | PAR-CLIP                                         | 1155 | SLC16A7  | 9194   | Biotin-Microarrays              |
| 80. | HCCS     | 3052 | Proteomics                                       | 1156 | ZNF430   | 80264  | Biotin-Microarrays              |
| 81. | UBE2K    | 3093 | Proteomics                                       | 1157 | TGIF2    | 60436  | Biotin-Microarrays              |
| 82. | HLA-DQA1 | 3117 | Microarray                                       | 1158 | MFSD1    | 64747  | Biotin-Microarrays              |
| 83. | HLA-E    | 3133 | HITS-CLIP                                        | 1159 | RAB3GAP2 | 25782  | Biotin-Microarrays              |
| 84. | HMOX1    | 3162 | Microarray//qRT-PCR//Western blot                | 1160 | UBN1     | 29855  | Biotin-Microarrays              |
| 85. | DNAJB1   | 3337 | Microarray                                       | 1161 | SATB2    | 23314  | Biotin-Microarrays              |
| 86. | IDS      | 3423 | HITS-CLIP//Microarray                            | 1162 | TJP2     | 9414   | Biotin-Microarrays              |
| 87. | IFNA1    | 3439 | Microarray                                       | 1163 | CNTRL    | 11064  | Biotin-Microarrays              |
| 88. | IFNAR2   | 3455 | HITS-CLIP                                        | 1164 | PPP6C    | 5537   | Biotin-Microarrays              |
| 89. | IGF1R    | 3480 | Luciferase reporter assay//qRT-                  | 1165 | HSDL2    | 84263  | Biotin-Microarrays              |

|      |        |      |                                                  |      |           |        |                                 |
|------|--------|------|--------------------------------------------------|------|-----------|--------|---------------------------------|
|      |        |      | PCR//Reporter assay//Western blot                |      |           |        |                                 |
| 90.  | IL1A   | 3552 | Luciferase reporter assay//qRT-PCR//Western blot | 1166 | DENND1A   | 57706  | Biotin-Microarrays, Microarrays |
| 91.  | IL2RA  | 3559 | HITS-CLIP                                        | 1167 | KDSR      | 2531   | Biotin-Microarrays              |
| 92.  | FOXK2  | 3607 | Microarray//PAR-CLIP                             | 1168 | ONECUT2   | 9480   | Biotin-Microarrays              |
| 93.  | KCNA7  | 3743 | HITS-CLIP                                        | 1169 | YLPM1     | 56252  | Biotin-Microarrays              |
| 94.  | KRT10  | 3858 | Proteomics                                       | 1170 | PGF       | 5228   | Biotin-Microarrays              |
| 95.  | KRT14  | 3861 | Microarray                                       | 1171 | RBM25     | 58517  | Biotin-Microarrays              |
| 96.  | KRT18  | 3875 | Proteomics                                       | 1172 | KLHL29    | 114818 | Biotin-Microarrays              |
| 97.  | LAMP1  | 3916 | Microarray                                       | 1173 | YPEL5     | 51646  | Microarrays                     |
| 98.  | ABLIM1 | 3983 | Microarray                                       | 1174 | FAM98A    | 25940  | Biotin-Microarrays              |
| 99.  | LIMS1  | 3987 | HITS-CLIP                                        | 1175 | OGFRL1    | 79627  | PAR-CLIP                        |
| 100. | LRP3   | 4037 | PAR-CLIP                                         | 1176 | IFIT3     | 3437   | Microarrays                     |
| 101. | LYN    | 4067 | PAR-CLIP                                         | 1177 | IFIT2     | 3433   | Microarrays                     |
| 102. | MARCKS | 4082 | Microarray                                       | 1178 | WDR11     | 55717  | Biotin-Microarrays              |
| 103. | MAFG   | 4097 | PAR-CLIP                                         | 1179 | KANSL1    | 284058 | Biotin-Microarrays              |
| 104. | MAZ    | 4150 | Microarray                                       | 1180 | HOXB3     | 3213   | Biotin-Microarrays              |
| 105. | MCAM   | 4162 | PAR-CLIP                                         | 1181 | GRIA2     | 2891   | Biotin-Microarrays              |
| 106. | MDM4   | 4194 | PAR-CLIP                                         | 1182 | KIAA1217  | 56243  | Biotin-Microarrays              |
| 107. | MECP2  | 4204 | Luciferase reporter assay//qRT-PCR               | 1183 | TNFSF11   | 8600   | Biotin-Microarrays              |
| 108. | MEF2D  | 4209 | Luciferase reporter assay                        | 1184 | MTRF1     | 9617   | Biotin-Microarrays              |
| 109. | MGAT1  | 4245 | PAR-CLIP                                         | 1185 | PROSER1   | 80209  | Microarrays                     |
| 110. | MKLN1  | 4289 | HITS-CLIP                                        | 1186 | KBTBD7    | 84078  | Biotin-Microarrays              |
| 111. | MPV17  | 4358 | Microarray                                       | 1187 | NR2C1     | 7181   | Biotin-Microarrays              |
| 112. | MSN    | 4478 | PAR-CLIP                                         | 1188 | GLT8D2    | 83468  | Microarrays                     |
| 113. | MTAP   | 4507 | HITS-CLIP                                        | 1189 | DUSP4     | 1846   | Biotin-Microarrays              |
| 114. | MYH11  | 4629 | HITS-CLIP                                        | 1190 | TNFRSF10B | 8795   | HITS-CLIP                       |
| 115. | NARS   | 4677 | HITS-CLIP                                        | 1191 | TNFRSF10B | 8795   | Microarrays                     |
| 116. | NASP   | 4678 | HITS-CLIP                                        | 1192 | AKAP1     | 8165   | Biotin-Microarrays              |
| 117. | NCAM1  | 4684 | Luciferase reporter assay//Microarray//qRT-PCR   | 1193 | PILRB     | 29990  | Biotin-Microarrays              |
| 118. | NFE2L1 | 4779 | HITS-CLIP//PAR-CLIP                              | 1194 | ZMYM2     | 7750   | Biotin-Microarrays              |
| 119. | NFX1   | 4799 | HITS-CLIP                                        | 1195 | CXCR4     | 7852   | Biotin-Microarrays              |

|      |         |      |                                                                        |      |                |        |                              |
|------|---------|------|------------------------------------------------------------------------|------|----------------|--------|------------------------------|
| 120. | NODAL   | 4838 | Microarray                                                             | 1196 | OCRL           | 4952   | Microarrays                  |
| 121. | SLC11A2 | 4891 | Microarray                                                             | 1197 | RBBP6          | 5930   | Biotin-Microarrays           |
| 122. | OMD     | 4958 | HITS-CLIP                                                              | 1198 | RPL5           | 6125   | Biotin-Microarrays           |
| 123. | OLR1    | 4973 | PAR-CLIP                                                               | 1199 | ODF2L          | 57489  | Biotin-Microarrays           |
| 124. | ORC2    | 4999 | Microarray                                                             | 1200 | CBX3           | 11335  | Biotin-Microarrays           |
| 125. | P4HA1   | 5033 | Luciferase reporter assay                                              | 1201 | KIAA1549       | 57670  | Biotin-Microarrays           |
| 126. | PAK1    | 5058 | Microarray                                                             | 1202 | NUDT10         | 170685 | Biotin-Microarrays           |
| 127. | PDK4    | 5166 | Luciferase reporter assay//qRT-PCR//Western blot                       | 1203 | SLC25A16       | 8034   | Biotin-Microarrays           |
| 128. | PFDN1   | 5201 | Microarray                                                             | 1204 | MED13L         | 23389  | PAR-CLIP, Biotin-Microarrays |
| 129. | PFKFB2  | 5208 | Microarray                                                             | 1205 | CCDC91         | 55297  | Biotin-Microarrays           |
| 130. | PHKA1   | 5255 | Microarray                                                             | 1206 | NLN            | 57486  | Biotin-Microarrays           |
| 131. | PIK3R2  | 5296 | PAR-CLIP                                                               | 1207 | ARHGAP9        | 64333  | Microarrays                  |
| 132. | PIP4K2A | 5305 | Microarray                                                             | 1208 | HOXC13         | 3229   | Microarrays                  |
| 133. | PKM     | 5315 | Luciferase reporter assay//Microarray//PAR-CLIP//qRT-PCR//Western blot | 1209 | IKZF4          | 64375  | Biotin-Microarrays           |
| 134. | PKNOX1  | 5316 | PAR-CLIP                                                               | 1210 | MORF4L2        | 9643   | Biotin-Microarrays           |
| 135. | PLAGL2  | 5326 | Microarray                                                             | 1211 | KCNJ2          | 3759   | Biotin-Microarrays           |
| 136. | PMP22   | 5376 | Microarray                                                             | 1212 | RAP2C          | 57826  | Biotin-Microarrays           |
| 137. | POLR2D  | 5433 | HITS-CLIP                                                              | 1213 | GCNT7          | 140687 | Biotin-Microarrays           |
| 138. | PPIC    | 5480 | PAR-CLIP                                                               | 1214 | VAPB           | 9217   | Biotin-Microarrays           |
| 139. | PRKAB1  | 5564 | Luciferase reporter assay                                              | 1215 | PLCG1          | 5335   | Biotin-Microarrays           |
| 140. | MAPK1   | 5594 | HITS-CLIP                                                              | 1216 | SRSF6          | 6431   | Microarrays                  |
| 141. | MAPK11  | 5600 | Luciferase reporter assay//qRT-PCR                                     | 1217 | ZNFX1          | 57169  | Microarrays                  |
| 142. | PSMB5   | 5693 | HITS-CLIP                                                              | 1218 | TMEM189-UBE2V1 | 387522 | PAR-CLIP                     |
| 143. | PSMD10  | 5716 | Proteomics                                                             | 1219 | SERPINB6       | 5269   | Biotin-Microarrays           |
| 144. | PSPH    | 5723 | Proteomics                                                             | 1220 | ABCC10         | 89845  | Biotin-Microarrays           |
| 145. | QSOX1   | 5768 | PAR-CLIP                                                               | 1221 | RPS10          | 6204   | Biotin-Microarrays           |
| 146. | PTPN1   | 5770 | Luciferase reporter assay                                              | 1222 | SOX4           | 6659   | Biotin-Microarrays           |
| 147. | PTPN2   | 5771 | HITS-CLIP                                                              | 1223 | RREB1          | 6239   | Biotin-Microarrays           |
| 148. | MAP4K2  | 5871 | HITS-CLIP                                                              | 1224 | ATXN1          | 6310   | Microarrays                  |
| 149. | RAC1    | 5879 | //Luciferase reporter                                                  | 1225 | NUP153         | 9972   | Biotin-Microarrays           |

|      |         |      |                                                                                 |      |          |        |                                |
|------|---------|------|---------------------------------------------------------------------------------|------|----------|--------|--------------------------------|
|      |         |      | assay//Microarray//qRT-PCR//Western blot                                        |      |          |        |                                |
| 150. | RAD21   | 5885 | PAR-CLIP                                                                        | 1226 | TMTC4    | 84899  | Biotin-Microarrays             |
| 151. | RBBP5   | 5929 | Microarray                                                                      | 1227 | GGA3     | 23163  | Biotin-Microarrays             |
| 152. | RBL1    | 5933 | HITS-CLIP                                                                       | 1228 | NUP85    | 79902  | PAR-CLIP                       |
| 153. | REL     | 5966 | PAR-CLIP                                                                        | 1229 | SLC25A19 | 60386  | Microarrays                    |
| 154. | RFC2    | 5982 | HITS-CLIP                                                                       | 1230 | PPDPF    | 79144  | Biotin-Microarrays             |
| 155. | RPS15A  | 6210 | HITS-CLIP                                                                       | 1231 | POLR1B   | 84172  | Biotin-Microarrays             |
| 156. | CLEC11A | 6320 | Microarray                                                                      | 1232 | THOC2    | 57187  | Biotin-Microarrays             |
| 157. | SCN4B   | 6330 | Microarray                                                                      | 1233 | RPL23    | 9349   | Biotin-Microarrays             |
| 158. | SET     | 6418 | Proteomics                                                                      | 1234 | FOSB     | 2354   | HITS-CLIP                      |
| 159. | SH3GL1  | 6455 | PAR-CLIP                                                                        | 1235 | EML2     | 24139  | Biotin-Microarrays             |
| 160. | ST3GAL1 | 6482 | HITS-CLIP                                                                       | 1236 | SYMPK    | 8189   | Biotin-Microarrays             |
| 161. | SLC1A5  | 6510 | HITS-CLIP                                                                       | 1237 | AP5S1    | 55317  | CLEAR-CLIP                     |
| 162. | SLC2A3  | 6515 | PAR-CLIP                                                                        | 1238 | RRBP1    | 6238   | Biotin-Microarrays             |
| 163. | SLC4A1  | 6521 | PAR-CLIP                                                                        | 1239 | ZNF133   | 7692   | Biotin-Microarrays             |
| 164. |         |      | Luciferase reporter assay//Northern blot//qRT-PCR//Reporter assay//Western blot |      |          |        |                                |
|      | SLC7A1  | 6541 |                                                                                 | 1240 | FLRT3    | 23767  | Biotin-Microarrays             |
| 165. | SLC9A1  | 6548 | Microarray//PAR-CLIP                                                            | 1241 | TBC1D20  | 128637 | Biotin-Microarrays             |
| 166. | SLC15A2 | 6565 | Microarray                                                                      | 1242 | ST3GAL3  | 6487   | PAR-CLIP                       |
| 167. | SNTB2   | 6645 | HITS-CLIP                                                                       | 1243 | CAPNS1   | 826    | HITS-CLIP                      |
| 168. | SOX2    | 6657 | Microarray                                                                      | 1244 | THRA     | 7067   | Biotin-Microarrays             |
| 169. | SPIB    | 6689 | HITS-CLIP                                                                       | 1245 | KTN1     | 3895   | Biotin-Microarrays             |
| 170. |         |      | Luciferase reporter assay//qRT-PCR//Western blot                                |      |          |        |                                |
|      | SRF     | 6722 |                                                                                 | 1246 | TIMM8A   | 1678   | Biotin-Microarrays             |
| 171. |         |      |                                                                                 |      |          |        | Biotin-Microarrays, CLEAR-CLIP |
|      | SSR3    | 6747 | Microarray                                                                      | 1247 | CANX     | 821    |                                |
| 172. | SSTR2   | 6752 | HITS-CLIP                                                                       | 1248 | IPPK     | 64768  | Biotin-Microarrays             |
| 173. | STXBP2  | 6813 | HITS-CLIP                                                                       | 1249 | EMC1     | 23065  | Biotin-Microarrays             |
| 174. |         |      | Luciferase reporter assay//qRT-PCR                                              |      |          |        |                                |
|      | ADAM17  | 6868 |                                                                                 | 1250 | PLA2G5   | 5322   | Biotin-Microarrays             |
| 175. | TCP11   | 6954 | Microarray                                                                      | 1251 | UBR4     | 23352  | HITS-CLIP                      |
| 176. | TEP1    | 7011 | HITS-CLIP                                                                       | 1252 | CHTF18   | 63922  | Biotin-Microarrays             |



|      |           |      |                                                              |      |          |        |                              |
|------|-----------|------|--------------------------------------------------------------|------|----------|--------|------------------------------|
| 177. | TERF2     | 7014 | HITS-CLIP                                                    | 1253 | GNG13    | 51764  | Microarrays                  |
| 178. | TFDP2     | 7029 | PAR-CLIP                                                     | 1254 | MACF1    | 23499  | Biotin-Microarrays           |
| 179. | TGFB1     | 7040 | qRT-PCR                                                      | 1255 | SMARCA4  | 6597   | Biotin-Microarrays           |
| 180. | TIAL1     | 7073 | HITS-CLIP                                                    | 1256 | KDM4B    | 23030  | Biotin-Microarrays           |
| 181. | TPD52L2   | 7165 | Luciferase reporter assay//Microarray//qRT-PCR               | 1257 | PTPN12   | 5782   | Biotin-Microarrays           |
| 182. | UBE2G2    | 7327 | HITS-CLIP                                                    | 1258 | PEX1     | 5189   | Biotin-Microarrays           |
| 183. | UBE2L3    | 7332 | Microarray                                                   | 1259 | LRFN1    | 57622  | Biotin-Microarrays           |
| 184. | SUMO1     | 7341 | PAR-CLIP                                                     | 1260 | SRD5A3   | 79644  | Microarrays                  |
| 185. | UBTF      | 7343 | PAR-CLIP                                                     | 1261 | GNAZ     | 2781   | Biotin-Microarrays           |
| 186. | UROS      | 7390 | PAR-CLIP                                                     | 1262 | KRT17    | 3872   | Microarrays                  |
| 187. | VDR       | 7421 | PAR-CLIP                                                     | 1263 | FOXP2    | 93986  | PAR-CLIP, Biotin-Microarrays |
| 188. | VEGFC     | 7424 | ELISA//Luciferase reporter assay//qRT-PCR//Western blot      | 1264 | STRIP2   | 57464  | Microarrays                  |
| 189. | VHL       | 7428 | Microarray                                                   | 1265 | DNAJB9   | 4189   | Microarrays                  |
| 190. | WNT1      | 7471 | Luciferase reporter assay//qRT-PCR//Western blot             | 1266 | NDUFA5   | 4698   | Biotin-Microarrays           |
| 191. | YWHAB     | 7529 | HITS-CLIP//PAR-CLIP                                          | 1267 | GAD1     | 2571   | Biotin-Microarrays           |
| 192. | ZNF74     | 7625 | HITS-CLIP                                                    | 1268 | SNRPN    | 6638   | Biotin-Microarrays           |
| 193. | ZNF154    | 7710 | PAR-CLIP                                                     | 1269 | MYO5C    | 55930  | Microarrays                  |
| 194. | ZNF226    | 7769 | PAR-CLIP                                                     | 1270 | TTBK2    | 146057 | Biotin-Microarrays           |
| 195. | LUZP1     | 7798 | Microarray                                                   | 1271 | VPS13C   | 54832  | Biotin-Microarrays           |
| 196. | MAFK      | 7975 | PAR-CLIP                                                     | 1272 | PALLD    | 23022  | Biotin-Microarrays           |
| 197. | ARHGEF5   | 7984 | HITS-CLIP                                                    | 1273 | RPAIN    | 84268  | Biotin-Microarrays           |
| 198. | MLF2      | 8079 | PAR-CLIP                                                     | 1274 | AIPL1    | 23746  | Biotin-Microarrays           |
| 199. | SLC7A5    | 8140 | PAR-CLIP                                                     | 1275 | PHF20L1  | 51105  | Biotin-Microarrays           |
| 200. | SLC10A3   | 8273 | PAR-CLIP                                                     | 1276 | ILF3     | 3609   | Biotin-Microarrays           |
| 201. | IFITM1    | 8519 | PAR-CLIP                                                     | 1277 | MTUS1    | 57509  | Biotin-Microarrays           |
| 202. | DGKE      | 8526 | HITS-CLIP                                                    | 1278 | MIS18BP1 | 55320  | Biotin-Microarrays           |
| 203. | MAPKAP K5 | 8550 | PAR-CLIP                                                     | 1279 | SEC14L1  | 6397   | Biotin-Microarrays           |
| 204. | PRKRA     | 8575 | Luciferase reporter assay//Microarray//qRT-PCR//Western blot | 1280 | RHBDF2   | 79651  | Biotin-Microarrays           |
| 205. | SOCS1     | 8651 | GFP reporter assay                                           | 1281 | PHF10    | 55274  | Biotin-Microarrays           |

|      |          |      |                                    |      |          |        |                    |
|------|----------|------|------------------------------------|------|----------|--------|--------------------|
| 206. | PEA15    | 8682 | Microarray                         | 1282 | SAT1     | 6303   | Microarrays        |
| 207. | TNFSF14  | 8740 | PAR-CLIP                           | 1283 | PXDN     | 7837   | Biotin-Microarrays |
| 208. | SUCLA2   | 8803 | Microarray                         | 1284 | GDF15    | 9518   | Microarrays        |
| 209. | CDKL1    | 8814 | PAR-CLIP                           | 1285 | JUND     | 3727   | Biotin-Microarrays |
| 210. | WASF1    | 8936 | Microarray                         | 1286 | CAMSAP1  | 157922 | Biotin-Microarrays |
| 211. | SPAG9    | 9043 | Microarray                         | 1287 | H19      | 283120 | Biotin-Microarrays |
| 212. | TBX19    | 9095 | Luciferase reporter assay//qRT-PCR | 1288 | COL5A1   | 1289   | Biotin-Microarrays |
| 213. | USP10    | 9100 | Microarray                         | 1289 | LAMA5    | 3911   | Biotin-Microarrays |
| 214. | SLC16A5  | 9121 | HITS-CLIP                          | 1290 | UCK1     | 83549  | Biotin-Microarrays |
| 215. | LRAT     | 9227 | HITS-CLIP                          | 1291 | YIPF2    | 78992  | Biotin-Microarrays |
| 216. | RPS6KA5  | 9252 | HITS-CLIP                          | 1292 | EIF2S3   | 1968   | Biotin-Microarrays |
| 217. | NUMBL    | 9253 | Luciferase reporter assay//qRT-PCR | 1293 | SESN2    | 83667  | Biotin-Microarrays |
| 218. | CD83     | 9308 | Microarray                         | 1294 | SLC35D2  | 11046  | Biotin-Microarrays |
| 219. | EFTUD2   | 9343 | PAR-CLIP                           | 1295 | RBM39    | 9584   | Biotin-Microarrays |
| 220. | TGFBRAP1 | 9392 | Microarray                         | 1296 | GSE1     | 23199  | Biotin-Microarrays |
| 221. | ZNF264   | 9422 | Microarray                         | 1297 | RLIM     | 51132  | Biotin-Microarrays |
| 222. | MED7     | 9443 | HITS-CLIP                          | 1298 | ANKHD1   | 54882  | Biotin-Microarrays |
| 223. | CHST3    | 9469 | Microarray                         | 1299 | DIAPH1   | 1729   | Biotin-Microarrays |
| 224. | AKAP5    | 9495 | PAR-CLIP                           | 1300 | MAP1B    | 4131   | Biotin-Microarrays |
| 225. | NPEPPS   | 9520 | Microarray                         | 1301 | TOP2A    | 7153   | Biotin-Microarrays |
| 226. | ENTPD4   | 9583 | Luciferase reporter assay//qRT-PCR | 1302 | STARD3   | 10948  | Microarrays        |
| 227. | PHF14    | 9678 | Microarray                         | 1303 | PRKAB2   | 5565   | Biotin-Microarrays |
| 228. | TRAM2    | 9697 | Microarray                         | 1304 | ZNF304   | 57343  | Biotin-Microarrays |
| 229. | KIAA0100 | 9703 | PAR-CLIP                           | 1305 | SNRPA1   | 6627   | Biotin-Microarrays |
| 230. | PCLAF    | 9768 | Microarray                         | 1306 | C19orf12 | 83636  | Microarrays        |
| 231. | BMS1     | 9790 | HITS-CLIP                          | 1307 | RAF1     | 5894   | Biotin-Microarrays |
| 232. | IST1     | 9798 | PAR-CLIP                           | 1308 | NUP210   | 23225  | Biotin-Microarrays |
| 233. | TOMM70   | 9868 | PAR-CLIP                           | 1309 | ENOSF1   | 55556  | Biotin-Microarrays |
| 234. | FIG4     | 9896 | HITS-CLIP                          | 1310 | IMMT     | 10989  | Biotin-Microarrays |
| 235. | NCAPD2   | 9918 | PAR-CLIP                           | 1311 | IQCA1    | 79781  | Biotin-Microarrays |
| 236. | HS3ST1   | 9957 | HITS-CLIP                          | 1312 | PRKAA1   | 5562   | Biotin-Microarrays |

|      |          |       |                                                              |      |          |        |                           |
|------|----------|-------|--------------------------------------------------------------|------|----------|--------|---------------------------|
| 237. | CCS      | 9973  | HITS-CLIP                                                    | 1313 | PNISR    | 25957  | Biotin-Microarrays        |
| 238. | AKT3     | 10000 | Immunoblot//Luciferase reporter assay//qRT-PCR               | 1314 | POPDC3   | 64208  | Biotin-Microarrays        |
| 239. | ABCF2    | 10061 | HITS-CLIP//PAR-CLIP                                          | 1315 | KDM6B    | 23135  | Biotin-Microarrays        |
| 240. | OPTN     | 10133 | HITS-CLIP                                                    | 1316 | VPS13B   | 157680 | Biotin-Microarrays        |
| 241. | PRMT3    | 10196 | PAR-CLIP                                                     | 1317 | SNAP25   | 6616   | Biotin-Microarrays        |
| 242. | TRIB1    | 10221 | Luciferase reporter assay//qRT-PCR                           | 1318 | DCAF8    | 50717  | Biotin-Microarrays        |
| 243. | DCAF7    | 10238 | HITS-CLIP                                                    | 1319 | ZMYM5    | 9205   | Biotin-Microarrays        |
| 244. | CALCOCO2 | 10241 | HITS-CLIP                                                    | 1320 | DCLK1    | 9201   | Biotin-Microarrays        |
| 245. | SPRY2    | 10253 | Luciferase reporter assay//Microarray//qRT-PCR//Western blot | 1321 | RFXAP    | 5994   | Biotin-Microarrays        |
| 246. | FSTL3    | 10272 | Microarray                                                   | 1322 | GPALPP1  | 55425  | Biotin-Microarrays        |
| 247. | PRSS16   | 10279 | PAR-CLIP                                                     | 1323 | WDR74    | 54663  | PAR-CLIP                  |
| 248. | SF3A1    | 10291 | HITS-CLIP                                                    | 1324 | SPINK5   | 11005  | Microarrays               |
| 249. | SEC23B   | 10483 | HITS-CLIP                                                    | 1325 | COX16    | 51241  | Biotin-Microarrays        |
| 250. | SPTLC1   | 10558 | Microarray                                                   | 1326 | MED6     | 10001  | Biotin-Microarrays        |
| 251. | SLC19A2  | 10560 | Microarray                                                   | 1327 | MRPS36   | 92259  | Biotin-Microarrays        |
| 252. | CDC42EP3 | 10602 | Microarray                                                   | 1328 | IRAK2    | 3656   | CLEAR-CLIP                |
| 253. | YKT6     | 10652 | Microarray                                                   | 1329 | PRPF38B  | 55119  | Biotin-Microarrays        |
| 254. | GMEB1    | 10691 | HITS-CLIP                                                    | 1330 | VAV3     | 10451  | Biotin-Microarrays        |
| 255. | YME1L1   | 10730 | HITS-CLIP                                                    | 1331 | SORT1    | 6272   | Luciferase Reporter Assay |
| 256. | KIF1C    | 10749 | HITS-CLIP                                                    | 1332 | PPHLN1   | 51535  | Biotin-Microarrays        |
| 257. | TOB2     | 10766 | Microarray//PAR-CLIP                                         | 1333 | FKBP11   | 51303  | Biotin-Microarrays        |
| 258. | RAB10    | 10890 | HITS-CLIP                                                    | 1334 | TMEM106C | 79022  | Biotin-Microarrays        |
| 259. | GPR75    | 10936 | PAR-CLIP                                                     | 1335 | IAH1     | 285148 | Biotin-Microarrays        |
| 260. | KDELR1   | 10945 | HITS-CLIP                                                    | 1336 | NAV1     | 89796  | Biotin-Microarrays        |
| 261. | AP3M2    | 10947 | Luciferase reporter assay//qRT-PCR                           | 1337 | TMEM241  | 85019  | Biotin-Microarrays        |
| 262. | PNRC1    | 10957 | HITS-CLIP                                                    | 1338 | TPGS2    | 25941  | Biotin-Microarrays        |
| 263. | ERP29    | 10961 | Proteomics                                                   | 1339 | COL4A2   | 1284   | Biotin-Microarrays        |
| 264. | LILRA2   | 11027 | HITS-CLIP                                                    | 1340 | ARGLU1   | 55082  | Biotin-Microarrays        |

|      |         |       |                                                  |      |          |        |                           |
|------|---------|-------|--------------------------------------------------|------|----------|--------|---------------------------|
| 265. | BTN3A2  | 11118 | HITS-CLIP                                        | 1341 | BIVM     | 54841  | Biotin-Microarrays        |
| 266. | KAT7    | 11143 | HITS-CLIP                                        | 1342 | TBX3     | 6926   | Biotin-Microarrays        |
| 267. | NUDT3   | 11165 | PAR-CLIP                                         | 1343 | OASL     | 8638   | Microarrays               |
| 268. | AKAP11  | 11215 | Microarray                                       | 1344 | HRK      | 8739   | Biotin-Microarrays        |
| 269. | GALNT6  | 11226 | PAR-CLIP                                         | 1345 | CEP162   | 22832  | Biotin-Microarrays        |
| 270. | PXMP4   | 11264 | HITS-CLIP                                        | 1346 | EHF      | 26298  | Biotin-Microarrays        |
| 271. | Cux1    | 13047 | qRT-PCR                                          | 1347 | CAPRIN1  | 4076   | PAR-CLIP                  |
| 272. | HSPA4L  | 22824 | PAR-CLIP                                         | 1348 | AVIL     | 10677  | Biotin-Microarrays        |
| 273. | SLITRK3 | 22865 | HITS-CLIP                                        | 1349 | KRT7     | 3855   | Microarrays               |
| 274. | MLXIP   | 22877 | PAR-CLIP                                         | 1350 | HNRNPA1  | 3178   | Biotin-Microarrays        |
| 275. | FOXJ3   | 22887 | Luciferase reporter assay//qRT-PCR               | 1351 | AHI1     | 54806  | Biotin-Microarrays        |
| 276. | MAPRE1  | 22919 | Microarray                                       | 1352 | USP15    | 9958   | Microarrays               |
| 277. | POMZP3  | 22932 | Microarray                                       | 1353 | DYNC1LI2 | 1783   | Biotin-Microarrays        |
| 278. | FBXO21  | 23014 | PAR-CLIP                                         | 1354 | TAF5L    | 27097  | Microarrays               |
| 279. | UNC13A  | 23025 | HITS-CLIP                                        | 1355 | STX6     | 10228  | Luciferase Reporter Assay |
| 280. | SMG1    | 23049 | HITS-CLIP                                        | 1356 | DHX9     | 1660   | Biotin-Microarrays        |
| 281. | NMNAT2  | 23057 | Microarray                                       | 1357 | CEP350   | 9857   | Biotin-Microarrays        |
| 282. | ERC1    | 23085 | PAR-CLIP                                         | 1358 | LAMC1    | 3915   | Microarrays               |
| 283. | PEG10   | 23089 | Luciferase reporter assay                        | 1359 | COX5B    | 1329   | Biotin-Microarrays        |
| 284. | CDK19   | 23097 | PAR-CLIP                                         | 1360 | REV1     | 51455  | Biotin-Microarrays        |
| 285. | NCDN    | 23154 | Microarray                                       | 1361 | ARHGEF4  | 50649  | Biotin-Microarrays        |
| 286. | MPRIP   | 23164 | PAR-CLIP                                         | 1362 | FLNB     | 2317   | Biotin-Microarrays        |
| 287. | TTLL12  | 23170 | HITS-CLIP                                        | 1363 | PHF11    | 51131  | Biotin-Microarrays        |
| 288. | LPIN1   | 23175 | Luciferase reporter assay//qRT-PCR//Western blot | 1364 | LMO7     | 4008   | Biotin-Microarrays        |
| 289. | XPO6    | 23214 | Luciferase reporter assay//qRT-PCR               | 1365 | SPDYE1   | 285955 | Biotin-Microarrays        |
| 290. | SIK2    | 23235 | HITS-CLIP                                        | 1366 | IGF2BP3  | 10643  | Biotin-Microarrays        |
| 291. | WWC1    | 23286 | HITS-CLIP                                        | 1367 | IL6      | 3569   | Microarrays               |
| 292. | CTDNEP1 | 23399 | Luciferase reporter assay//qRT-PCR//Western blot | 1368 | SRSF1    | 6426   | Biotin-Microarrays        |
| 293. | GPR161  | 23432 | PAR-CLIP                                         | 1369 | DNAJC1   | 64215  | Biotin-Microarrays        |
| 294. | SLC44A1 | 23446 | Microarray                                       | 1370 | CDK5RAP2 | 55755  | Biotin-Microarrays        |
| 295. | ABCA6   | 23460 | HITS-CLIP                                        | 1371 | GARNL3   | 84253  | Biotin-Microarrays        |

|      |         |       |                                                          |      |         |       |                                 |
|------|---------|-------|----------------------------------------------------------|------|---------|-------|---------------------------------|
| 296. | QPRT    | 23475 | HITS-CLIP                                                | 1372 | PSMB7   | 5695  | Biotin-Microarrays              |
| 297. | POFUT1  | 23509 | Microarray                                               | 1373 | MYC     | 4609  | qPCR, Western Blot              |
| 298. | ZNF281  | 23528 | HITS-CLIP                                                | 1374 | DENND4C | 55667 | Biotin-Microarrays              |
| 299. | DNPEP   | 23549 | HITS-CLIP                                                | 1375 | KIF13A  | 63971 | Biotin-Microarrays              |
| 300. | HEBP2   | 23593 | HITS-CLIP                                                | 1376 | YIPF3   | 25844 | PAR-CLIP                        |
| 301. | ORC6    | 23594 | PAR-CLIP                                                 | 1377 | FOXF2   | 2295  | Microarrays                     |
| 302. | ACOT9   | 23597 | HITS-CLIP                                                | 1378 | IER3    | 8870  | Biotin-Microarrays              |
| 303. | PATZ1   | 23598 | PAR-CLIP                                                 | 1379 | NUMA1   | 4926  | PAR-CLIP                        |
| 304. | PHLDA3  | 23612 | HITS-CLIP                                                | 1380 | CCDC90B | 60492 | Biotin-Microarrays              |
| 305. | TRIM29  | 23650 | Microarray                                               | 1381 | TGS1    | 96764 | Biotin-Microarrays              |
| 306. | SLC7A11 | 23657 | Luciferase reporter assay//qRT-PCR                       | 1382 | NEK1    | 4750  | Biotin-Microarrays              |
| 307. | OSBP2   | 23762 | Microarray                                               | 1383 | KIF23   | 9493  | Biotin-Microarrays              |
| 308. | MAFF    | 23764 | HITS-CLIP                                                | 1384 | HAUS2   | 55142 | Biotin-Microarrays              |
| 309. | DSTYK   | 25778 | Luciferase reporter assay//qRT-PCR                       | 1385 | UACA    | 55075 | Biotin-Microarrays              |
| 310. | FBXO7   | 25793 | Microarray                                               | 1386 | IFI44   | 10561 | Microarrays                     |
| 311. | BAMBI   | 25805 | HITS-CLIP                                                | 1387 | CYP1B1  | 1545  | Biotin-Microarrays              |
| 312. | MTO1    | 25821 | HITS-CLIP                                                | 1388 | RAB1A   | 5861  | Biotin-Microarrays              |
| 313. | TECPR1  | 25851 | HITS-CLIP                                                | 1389 | PREPL   | 9581  | Biotin-Microarrays              |
| 314. | CLIC4   | 25932 | Luciferase reporter assay//Microarray//PAR-CLIP//qRT-PCR | 1390 | FBXO11  | 80204 | Biotin-Microarrays              |
| 315. | HEATR5A | 25938 | PAR-CLIP                                                 | 1391 | ATRAID  | 51374 | Microarrays                     |
| 316. | RAI14   | 26064 | Microarray                                               | 1392 | LRPPRC  | 10128 | Biotin-Microarrays              |
| 317. | PYGO1   | 26108 | Microarray                                               | 1393 | MYOF    | 26509 | Biotin-Microarrays              |
| 318. | WSB1    | 26118 | PAR-CLIP                                                 | 1394 | KIF11   | 3832  | Biotin-Microarrays, Microarrays |
| 319. | ZNF658  | 26149 | Microarray                                               | 1395 | CEP55   | 55165 | Biotin-Microarrays, Microarrays |
| 320. | MYCBP   | 26292 | HITS-CLIP//Microarray                                    | 1396 | GPR87   | 53836 | Microarrays                     |
| 321. | STAU2   | 27067 | Microarray                                               | 1397 | ATIC    | 471   | HITS-CLIP                       |
| 322. | FOXP1   | 27086 | Luciferase reporter assay//qRT-PCR                       | 1398 | IDH1    | 3417  | Biotin-Microarrays              |
| 323. | ST6GALN | 27090 | Microarray                                               | 1399 | SEN7    | 57337 | Biotin-Microarrays              |

|      |         |       |                                    |      |          |        |                    |
|------|---------|-------|------------------------------------|------|----------|--------|--------------------|
|      | AC4     |       |                                    |      |          |        |                    |
| 324. | TNRC6A  | 27327 | PAR-CLIP                           | 1400 | FAM13A   | 10144  | Biotin-Microarrays |
| 325. | RABGEF1 | 27342 | Microarray                         | 1401 | AP1AR    | 55435  | Biotin-Microarrays |
| 326. | PHPT1   | 29085 | Proteomics                         | 1402 | HNRNPD   | 3184   | Biotin-Microarrays |
| 327. | RACGAP1 | 29127 | PAR-CLIP                           | 1403 | KIAA1109 | 84162  | Biotin-Microarrays |
| 328. | PARVB   | 29780 | HITS-CLIP//PAR-CLIP                | 1404 | BMPR1B   | 658    | Biotin-Microarrays |
| 329. | OLA1    | 29789 | HITS-CLIP                          | 1405 | LARP1B   | 55132  | Biotin-Microarrays |
| 330. | GPSM2   | 29899 | PAR-CLIP                           | 1406 | PRDM5    | 11107  | Biotin-Microarrays |
| 331. | EEF2K   | 29904 | PAR-CLIP                           | 1407 | TRPC3    | 7222   | Biotin-Microarrays |
| 332. | AK3     | 50808 | PAR-CLIP                           | 1408 | NUP54    | 53371  | Biotin-Microarrays |
| 333. | HDDC2   | 51020 | PAR-CLIP                           | 1409 | CXCL9    | 4283   | Biotin-Microarrays |
| 334. | GLOD4   | 51031 | Proteomics                         | 1410 | PPA2     | 27068  | Biotin-Microarrays |
| 335. | TUBD1   | 51174 | PAR-CLIP                           | 1411 | FBN2     | 2201   | Biotin-Microarrays |
| 336. | ACP6    | 51205 | HITS-CLIP                          | 1412 | ETV6     | 2120   | Biotin-Microarrays |
| 337. | NT5C3A  | 51251 | Luciferase reporter assay          | 1413 | C1RL     | 51279  | Biotin-Microarrays |
| 338. | NIP7    | 51388 | HITS-CLIP                          | 1414 | SCAF11   | 9169   | Biotin-Microarrays |
| 339. | CINP    | 51550 | HITS-CLIP                          | 1415 | TMTC3    | 160418 | Biotin-Microarrays |
| 340. | RAB6B   | 51560 | Luciferase reporter assay//qRT-PCR | 1416 | KERA     | 11081  | Microarrays        |
| 341. | GDE1    | 51573 | HITS-CLIP                          | 1417 | SYCP3    | 50511  | Biotin-Microarrays |
| 342. | ESF1    | 51575 | HITS-CLIP                          | 1418 | GAS2L3   | 283431 | Biotin-Microarrays |
| 343. | MRPS23  | 51649 | PAR-CLIP                           | 1419 | TDG      | 6996   | Microarrays        |
| 344. | MSRB1   | 51734 | PAR-CLIP                           | 1420 | SMARCC2  | 6601   | Biotin-Microarrays |
| 345. | NLGN3   | 54413 | Microarray                         | 1421 | CSAD     | 51380  | Biotin-Microarrays |
| 346. | TAS2R5  | 54429 | HITS-CLIP//PAR-CLIP                | 1422 | LMBR1L   | 55716  | Biotin-Microarrays |
| 347. | RNF216  | 54476 | HITS-CLIP                          | 1423 | TMBIM6   | 7009   | Microarrays        |
| 348. | TMCO1   | 54499 | HITS-CLIP                          | 1424 | RBM26    | 64062  | Biotin-Microarrays |
| 349. | RBM47   | 54502 | PAR-CLIP                           | 1425 | MBNL2    | 10150  | Biotin-Microarrays |
| 350. | GNL3L   | 54552 | Microarray                         | 1426 | CUL4A    | 8451   | Biotin-Microarrays |
| 351. | INO80   | 54617 | HITS-CLIP                          | 1427 | SLC12A6  | 9990   | Biotin-Microarrays |
| 352. | MED18   | 54797 | HITS-CLIP                          | 1428 | TCF12    | 6938   | Biotin-Microarrays |
| 353. | PIGG    | 54872 | HITS-CLIP                          | 1429 | ZSCAN29  | 146050 | Biotin-Microarrays |
| 354. | ZCCHC2  | 54877 | Microarray                         | 1430 | GTF2A2   | 2958   | Biotin-Microarrays |
| 355. | RHBDL2  | 54933 | HITS-CLIP                          | 1431 | BCL2A1   | 597    | Biotin-Microarrays |

|      |          |       |                                                                                                                    |      |         |        |                                    |
|------|----------|-------|--------------------------------------------------------------------------------------------------------------------|------|---------|--------|------------------------------------|
| 356. | PIGX     | 54965 | HITS-CLIP                                                                                                          | 1432 | WDR61   | 80349  | Biotin-Microarrays                 |
| 357. | FAM118A  | 55007 | Microarray                                                                                                         | 1433 | PCSK6   | 5046   | Biotin-Microarrays                 |
| 358. | PTCD3    | 55037 | HITS-CLIP                                                                                                          | 1434 | CYP1A2  | 1544   | Biotin-Microarrays                 |
| 359. | RBM23    | 55147 | HITS-CLIP                                                                                                          | 1435 | ABHD2   | 11057  | Biotin-Microarrays                 |
| 360. | SBNO1    | 55206 | HITS-CLIP                                                                                                          | 1436 | MFGE8   | 4240   | Biotin-Microarrays                 |
| 361. | VPS53    | 55275 | HITS-CLIP                                                                                                          | 1437 | UNC45A  | 55898  | Biotin-Microarrays                 |
| 362. | C4orf19  | 55286 | PAR-CLIP                                                                                                           | 1438 | MCTP2   | 55784  | Biotin-Microarrays                 |
| 363. | TMEM40   | 55287 | HITS-CLIP                                                                                                          | 1439 | FURIN   | 5045   | Microarrays                        |
| 364. | SPTLC3   | 55304 | HITS-CLIP                                                                                                          | 1440 | IQGAP1  | 8826   | Biotin-Microarrays,<br>Microarrays |
| 365. | CHDH     | 55349 | HITS-CLIP                                                                                                          | 1441 | ZFH3    | 463    | Biotin-Microarrays                 |
| 366. | NCBP3    | 55421 | HITS-CLIP                                                                                                          | 1442 | NLRC5   | 84166  | Biotin-Microarrays                 |
| 367. | CHST12   | 55501 | Microarray                                                                                                         | 1443 | PDPK1   | 5170   | Biotin-Microarrays                 |
| 368. | SLC35E3  | 55508 | HITS-CLIP                                                                                                          | 1444 | TCF25   | 22980  | HITS-CLIP, Biotin-Microarrays      |
| 369. | RBM38    | 55544 | PAR-CLIP                                                                                                           | 1445 | ESCO1   | 114799 | Biotin-Microarrays                 |
| 370. | GALNT10  | 55568 | Immunohistochemistry//Immunoprecipitation//In situ hybridization//Luciferase reporter assay//qRT-PCR//Western blot | 1446 | GREB1L  | 80000  | Biotin-Microarrays                 |
| 371. | NAGK     | 55577 | HITS-CLIP                                                                                                          | 1447 | PELP1   | 27043  | Microarrays                        |
| 372. | MED29    | 55588 | HITS-CLIP                                                                                                          | 1448 | MINK1   | 50488  | Biotin-Microarrays                 |
| 373. | ANKRD10  | 55608 | Microarray                                                                                                         | 1449 | TP53    | 7157   | Biotin-Microarrays                 |
| 374. | TBC1D22B | 55633 | Microarray                                                                                                         | 1450 | TMC6    | 11322  | Biotin-Microarrays                 |
| 375. | MREG     | 55686 | PAR-CLIP                                                                                                           | 1451 | SLC16A3 | 9123   | Biotin-Microarrays                 |
| 376. | LUC7L    | 55692 | HITS-CLIP                                                                                                          | 1452 | SECTM1  | 6398   | Biotin-Microarrays                 |
| 377. | HHAT     | 55733 | Microarray                                                                                                         | 1453 | RNF165  | 494470 | Biotin-Microarrays                 |
| 378. | PRR11    | 55771 | Microarray                                                                                                         | 1454 | SMAD4   | 4089   | Biotin-Microarrays                 |
| 379. | METTL2B  | 55798 | HITS-CLIP                                                                                                          | 1455 | NFIC    | 4782   | Biotin-Microarrays                 |
| 380. | LRP2BP   | 55805 | HITS-CLIP                                                                                                          | 1456 | PRDM15  | 63977  | Biotin-Microarrays                 |
| 381. | EMC3     | 55831 | PAR-CLIP                                                                                                           | 1457 | AKT1    | 207    | qPCR, Western Blot                 |
| 382. | UBAP2    | 55833 | Luciferase reporter assay//qRT-PCR                                                                                 | 1458 | EVI5L   | 115704 | HITS-CLIP                          |
| 383. | ZC3H15   | 55854 | HITS-CLIP                                                                                                          | 1459 | RERE    | 473    | Microarrays                        |



|      |          |       |                                                  |      |          |        |                                              |
|------|----------|-------|--------------------------------------------------|------|----------|--------|----------------------------------------------|
| 384. | ZNF395   | 55893 | GFP reporter assay                               | 1460 | EPHA2    | 1969   | HITS-CLIP                                    |
| 385. | KLHL7    | 55975 | PAR-CLIP                                         | 1461 | LMO4     | 8543   | Biotin-Microarrays                           |
| 386. | ALG1     | 56052 | HITS-CLIP                                        | 1462 | ATP1B1   | 481    | Biotin-Microarrays                           |
| 387. | TDRD1    | 56165 | HITS-CLIP                                        | 1463 | DCAF6    | 55827  | Biotin-Microarrays                           |
| 388. | SAR1A    | 56681 | HITS-CLIP                                        | 1464 | POU2F1   | 5451   | Biotin-Microarrays                           |
| 389. | KCMF1    | 56888 | HITS-CLIP                                        | 1465 | XPR1     | 9213   | Microarrays                                  |
| 390. | PARP11   | 57097 | Microarray                                       | 1466 | TOR1AIP1 | 26092  | Biotin-Microarrays                           |
| 391. | LYRM4    | 57128 | HITS-CLIP                                        | 1467 | ADAMTSL4 | 54507  | Biotin-Microarrays                           |
| 392. | APMAP    | 57136 | Proteomics                                       | 1468 | PI4KB    | 5298   | PAR-CLIP                                     |
| 393. | JPH2     | 57158 | HITS-CLIP                                        | 1469 | ENSA     | 2029   | Biotin-Microarrays,<br>Microarrays           |
| 394. | CLK4     | 57396 | HITS-CLIP                                        | 1470 | GOLPH3L  | 55204  | Microarrays                                  |
| 395. | CYP20A1  | 57404 | HITS-CLIP                                        | 1471 | INTS7    | 25896  | Biotin-Microarrays                           |
| 396. | KIAA1143 | 57456 | HITS-CLIP                                        | 1472 | KCNN3    | 3782   | PAR-CLIP                                     |
| 397. | ESYT2    | 57488 | HITS-CLIP                                        | 1473 | GATAD2B  | 57459  | Biotin-Microarrays                           |
| 398. | XPO5     | 57510 | HITS-CLIP                                        | 1474 | ARF1     | 375    | Biotin-Microarrays                           |
| 399. | HECW2    | 57520 | Microarray                                       | 1475 | CDC42BPA | 8476   | Biotin-Microarrays                           |
| 400. | PDP2     | 57546 | HITS-CLIP                                        | 1476 | PLEKHA6  | 22874  | HITS-CLIP, Biotin-Microarrays                |
| 401. | EP400    | 57634 | Microarray                                       | 1477 | ASXL2    | 55252  | Biotin-Microarrays                           |
| 402. | USP28    | 57646 | Microarray                                       | 1478 | SNRNP200 | 23020  | Biotin-Microarrays                           |
| 403. | ZBTB4    | 57659 | Microarray                                       | 1479 | MRPS5    | 64969  | Biotin-Microarrays                           |
| 404. | ZFP14    | 57677 | HITS-CLIP                                        | 1480 | DQX1     | 165545 | Microarrays                                  |
| 405. | CPNE5    | 57699 | Microarray                                       | 1481 | SLC20A1  | 6574   | Biotin-Microarrays                           |
| 406. | POLD4    | 57804 | PAR-CLIP                                         | 1482 | SCRN3    | 79634  | Biotin-Microarrays                           |
| 407. | MRPL17   | 63875 | HITS-CLIP                                        | 1483 | TMEFF2   | 23671  | Biotin-Microarrays                           |
| 408. | FAM217B  | 63939 | HITS-CLIP                                        | 1484 | CDCA7    | 83879  | Biotin-Microarrays                           |
| 409. | CLSPN    | 63967 | Microarray                                       | 1485 | PHOSPHO2 | 493911 | Biotin-Microarrays                           |
| 410. | NOD2     | 64127 | Luciferase reporter assay//qRT-PCR//Western blot | 1486 | CCDC150  | 284992 | Biotin-Microarrays                           |
| 411. | ZNF106   | 64397 | PAR-CLIP                                         | 1487 | RHBDD1   | 84236  | Biotin-Microarrays, PAR-CLIP,<br>Microarrays |
| 412. | TMEM168  | 64418 | HITS-CLIP                                        | 1488 | ACKR3    | 57007  | Biotin-Microarrays                           |
| 413. | MRPS25   | 64432 | HITS-CLIP                                        | 1489 | COPS7B   | 64708  | Biotin-Microarrays                           |
| 414. | NOM1     | 64434 | HITS-CLIP                                        | 1490 | DIS3L2   | 129563 | Biotin-Microarrays                           |

|      |           |       |                                               |      |         |        |                                 |
|------|-----------|-------|-----------------------------------------------|------|---------|--------|---------------------------------|
| 415. | SMURF2    | 64750 | Microarray                                    | 1491 | TAMM41  | 132001 | Biotin-Microarrays              |
| 416. | MEAF6     | 64769 | HITS-CLIP                                     | 1492 | VGLL4   | 9686   | Biotin-Microarrays              |
| 417. | EFCAB6    | 64800 | Proteomics                                    | 1493 | RBMS3   | 27303  | Biotin-Microarrays              |
| 418. | KRI1      | 65095 | PAR-CLIP                                      | 1494 | GOLGA4  | 2803   | Biotin-Microarrays              |
| 419. | AACS      | 65985 | Luciferase reporter assay//qRT-PCR            | 1495 | CTDSPL  | 10217  | Biotin-Microarrays, Microarrays |
| 420. | FUNDC2    | 65991 | Luciferase reporter assay//qRT-PCR            | 1496 | TMF1    | 7110   | Biotin-Microarrays              |
| 421. | CENPM     | 79019 | HITS-CLIP                                     | 1497 | LRIG1   | 26018  | HITS-CLIP                       |
| 422. | ZNF655    | 79027 | HITS-CLIP                                     | 1498 | NFKBIZ  | 64332  | Biotin-Microarrays              |
| 423. | GLB1L     | 79411 | HITS-CLIP                                     | 1499 | COL8A1  | 1295   | Biotin-Microarrays              |
| 424. | ATP13A3   | 79572 | Microarray                                    | 1500 | NCEH1   | 57552  | Microarrays                     |
| 425. | NKAP      | 79576 | HITS-CLIP                                     | 1501 | LPP     | 4026   | Biotin-Microarrays              |
| 426. | SLC52A2   | 79581 | Microarray                                    | 1502 | TMEM44  | 93109  | Biotin-Microarrays              |
| 427. | PGBD5     | 79605 | HITS-CLIP                                     | 1503 | SCD5    | 79966  | Biotin-Microarrays              |
| 428. | HECTD3    | 79654 | Microarray                                    | 1504 | USP53   | 54532  | Biotin-Microarrays              |
| 429. | ZYG11B    | 79699 | HITS-CLIP//PAR-CLIP                           | 1505 | CBR4    | 84869  | Biotin-Microarrays              |
| 430. | TBL1XR1   | 79718 | Microarray                                    | 1506 | MYO10   | 4651   | Biotin-Microarrays              |
| 431. | MOB3B     | 79817 | Microarray                                    | 1507 | RPL37   | 6167   | Biotin-Microarrays              |
| 432. | MFSD13A   | 79847 | HITS-CLIP                                     | 1508 | BTF3    | 689    | Biotin-Microarrays              |
| 433. | SNX22     | 79856 | HITS-CLIP                                     | 1509 | FBXL17  | 64839  | Biotin-Microarrays              |
| 434. | ACTR5     | 79913 | HITS-CLIP                                     | 1510 | DDX46   | 9879   | Biotin-Microarrays              |
| 435. | ADM2      | 79924 | HITS-CLIP                                     | 1511 | RNF145  | 153830 | Biotin-Microarrays              |
| 436. | TNIP3     | 79931 | HITS-CLIP                                     | 1512 | G3BP1   | 10146  | Biotin-Microarrays              |
| 437. | SYNPO2L   | 79933 | HITS-CLIP                                     | 1513 | GFOD1   | 54438  | PAR-CLIP                        |
| 438. | SLC35E1   | 79939 | HITS-CLIP                                     | 1514 | CDKAL1  | 54901  | Biotin-Microarrays              |
| 439. | PLEKHS1   | 79949 | HITS-CLIP//PAR-CLIP                           | 1515 | SCUBE3  | 222663 | Biotin-Microarrays              |
| 440. | NOL10     | 79954 | PAR-CLIP                                      | 1516 | SLC22A3 | 6581   | Biotin-Microarrays              |
| 441. | CCDC170   | 80129 | PAR-CLIP                                      | 1517 | VWDE    | 221806 | Biotin-Microarrays              |
| 442. | NAA50     | 80218 | HITS-CLIP                                     | 1518 | PURB    | 5814   | HITS-CLIP                       |
| 443. | RAB11FIP1 | 80223 | HITS-CLIP//Luciferase reporter assay//qRT-PCR | 1519 | ATXN7L1 | 222255 | Biotin-Microarrays              |
| 444. | ORAI2     | 80228 | HITS-CLIP//PAR-CLIP                           | 1520 | TRIM4   | 89122  | Biotin-Microarrays              |
| 445. | CXorf21   | 80231 | HITS-CLIP                                     | 1521 | SPIN2A  | 54466  | Biotin-Microarrays              |

|      |              |       |                                    |      |          |        |                    |
|------|--------------|-------|------------------------------------|------|----------|--------|--------------------|
| 446. | HM13         | 81502 | PAR-CLIP                           | 1522 | OGT      | 8473   | Biotin-Microarrays |
| 447. | ANKRD13<br>C | 81573 | Microarray                         | 1523 | MFHAS1   | 9258   | Biotin-Microarrays |
| 448. | NIPA2        | 81614 | PAR-CLIP                           | 1524 | SLC25A37 | 51312  | Biotin-Microarrays |
| 449. | TIGD6        | 81789 | HITS-CLIP                          | 1525 | DOCK5    | 80005  | Biotin-Microarrays |
| 450. | RNF170       | 81790 | HITS-CLIP//Microarray              | 1526 | ERLIN2   | 11160  | Biotin-Microarrays |
| 451. | THAP2        | 83591 | HITS-CLIP                          | 1527 | SLC26A7  | 115111 | Biotin-Microarrays |
| 452. | KATNAL<br>1  | 84056 | Microarray                         | 1528 | MTDH     | 92140  | HITS-CLIP          |
| 453. | MAGT1        | 84061 | HITS-CLIP                          | 1529 | ZCCHC7   | 84186  | Biotin-Microarrays |
| 454. | MRI1         | 84245 | HITS-CLIP                          | 1530 | ASTN2    | 23245  | Biotin-Microarrays |
| 455. | YIPF4        | 84272 | HITS-CLIP//PAR-CLIP                | 1531 | SURF1    | 6834   | Biotin-Microarrays |
| 456. | SLC25A33     | 84275 | HITS-CLIP                          | 1532 | SH3GLB2  | 56904  | Microarrays        |
| 457. | MCM8         | 84515 | PAR-CLIP                           | 1533 | NOTCH1   | 4851   | Biotin-Microarrays |
| 458. | DCTN5        | 84516 | Microarray                         | 1534 | POLR3A   | 11128  | Biotin-Microarrays |
| 459. | MT4          | 84560 | Microarray                         | 1535 | HERC4    | 26091  | Biotin-Microarrays |
| 460. | MFSD14B      | 84641 | PAR-CLIP                           | 1536 | PPRC1    | 23082  | Biotin-Microarrays |
| 461. | ZNF347       | 84671 | PAR-CLIP                           | 1537 | ITPRIP   | 85450  | Biotin-Microarrays |
| 462. | PPP1R9B      | 84687 | Microarray                         | 1538 | CNNM2    | 54805  | Biotin-Microarrays |
| 463. | PIGO         | 84720 | HITS-CLIP//PAR-CLIP                | 1539 | EIF3M    | 10480  | Biotin-Microarrays |
| 464. | CNDP1        | 84735 | HITS-CLIP                          | 1540 | CELF1    | 10658  | Biotin-Microarrays |
| 465. | LMNB2        | 84823 | Microarray//PAR-CLIP               | 1541 | INTS4    | 92105  | Biotin-Microarrays |
| 466. | LRCH3        | 84859 | HITS-CLIP                          | 1542 | ATM      | 472    | Biotin-Microarrays |
| 467. | CCDC142      | 84865 | HITS-CLIP                          | 1543 | ST14     | 6768   | Microarrays        |
| 468. | ADO          | 84890 | Microarray                         | 1544 | ADAM33   | 80332  | Biotin-Microarrays |
| 469. | POMGNT<br>2  | 84892 | Microarray                         | 1545 | TMEM25   | 84866  | PAR-CLIP           |
| 470. | PLXDC2       | 84898 | HITS-CLIP//PAR-CLIP                | 1546 | SOGA1    | 140710 | Biotin-Microarrays |
| 471. | NFATC2I<br>P | 84901 | Luciferase reporter assay//qRT-PCR | 1547 | LSM14B   | 149986 | Biotin-Microarrays |
| 472. | CEP89        | 84902 | HITS-CLIP                          | 1548 | ITGB1    | 3688   | Biotin-Microarrays |
| 473. | UTP4         | 84916 | HITS-CLIP//PAR-CLIP                | 1549 | LATS2    | 26524  | Biotin-Microarrays |
| 474. | LRP11        | 84918 | Microarray                         | 1550 | GXYLT1   | 283464 | Biotin-Microarrays |
| 475. | MASTL        | 84930 | HITS-CLIP                          | 1551 | DIP2C    | 22982  | Biotin-Microarrays |
| 476. | SERAC1       | 84947 | Microarray                         | 1552 | NPAS3    | 64067  | Biotin-Microarrays |

|      |          |        |                                                |      |          |        |                    |
|------|----------|--------|------------------------------------------------|------|----------|--------|--------------------|
| 477. | PRPF38A  | 84950  | PAR-CLIP                                       | 1553 | KCTD14   | 65987  | Biotin-Microarrays |
| 478. | RRP36    | 88745  | HITS-CLIP                                      | 1554 | ME3      | 10873  | Biotin-Microarrays |
| 479. | SIGLEC12 | 89858  | PAR-CLIP                                       | 1555 | C4orf33  | 132321 | Biotin-Microarrays |
| 480. | C16orf45 | 89927  | HITS-CLIP                                      | 1556 | PTPRO    | 5800   | Biotin-Microarrays |
| 481. | TMEM250  | 90120  | HITS-CLIP                                      | 1557 | VTI1A    | 143187 | Biotin-Microarrays |
| 482. | ZSWIM1   | 90204  | HITS-CLIP//PAR-CLIP                            | 1558 | MMAA     | 166785 | Biotin-Microarrays |
| 483. | ZNF160   | 90338  | Microarray                                     | 1559 | ZNF827   | 152485 | Biotin-Microarrays |
| 484. | TIMM29   | 90580  | HITS-CLIP//PAR-CLIP                            | 1560 | TMEM45B  | 120224 | Microarrays        |
| 485. | STARD13  | 90627  | Microarray                                     | 1561 | BICD1    | 636    | Biotin-Microarrays |
| 486. | MFSD4B   | 91749  | HITS-CLIP//PAR-CLIP                            | 1562 | PABPC3   | 5042   | Biotin-Microarrays |
| 487. | LIN52    | 91750  | HITS-CLIP                                      | 1563 | DST      | 667    | Biotin-Microarrays |
| 488. | SPECC1   | 92521  | HITS-CLIP                                      | 1564 | MZT2B    | 80097  | Biotin-Microarrays |
| 489. | G6PC3    | 92579  | Luciferase reporter assay//Microarray//qRT-PCR | 1565 | EPG5     | 57724  | Biotin-Microarrays |
| 490. | TIMM50   | 92609  | PAR-CLIP                                       | 1566 | DCLRE1C  | 64421  | Biotin-Microarrays |
| 491. | SYAP1    | 94056  | HITS-CLIP                                      | 1567 | NMT2     | 9397   | Biotin-Microarrays |
| 492. | EGLN3    | 112399 | Luciferase reporter assay//qRT-PCR             | 1568 | USP12    | 219333 | HITS-CLIP          |
| 493. | GTF3C6   | 112495 | Microarray                                     | 1569 | MBNL1    | 4154   | Biotin-Microarrays |
| 494. | XKR4     | 114786 | HITS-CLIP                                      | 1570 | GJA1     | 2697   | Biotin-Microarrays |
| 495. | RNF157   | 114804 | HITS-CLIP                                      | 1571 | FARP1    | 10160  | CLEAR-CLIP         |
| 496. | SMYD4    | 114826 | PAR-CLIP                                       | 1572 | HNRNPDL  | 9987   | Biotin-Microarrays |
| 497. | OSBPL10  | 114884 | HITS-CLIP//PAR-CLIP                            | 1573 | BCL2L11  | 10018  | Biotin-Microarrays |
| 498. | FLYWCH2  | 114984 | HITS-CLIP                                      | 1574 | RANBP2   | 5903   | Biotin-Microarrays |
| 499. | WDR31    | 114987 | HITS-CLIP                                      | 1575 | SLC25A27 | 9481   | Biotin-Microarrays |
| 500. | ZNF618   | 114991 | Microarray                                     | 1576 | CMTM7    | 112616 | PAR-CLIP           |
| 501. | BATF2    | 116071 | Microarray                                     | 1577 | CFDP1    | 10428  | Biotin-Microarrays |
| 502. | FAM210B  | 116151 | PAR-CLIP                                       | 1578 | CMIP     | 80790  | Biotin-Microarrays |
| 503. | MOGAT1   | 116255 | HITS-CLIP                                      | 1579 | TRIP12   | 9320   | HITS-CLIP          |
| 504. | WDR17    | 116966 | HITS-CLIP//PAR-CLIP                            | 1580 | KCTD15   | 79047  | Biotin-Microarrays |
| 505. | SLC16A10 | 117247 | HITS-CLIP                                      | 1581 | DDAH1    | 23576  | Microarrays        |
| 506. | ZNF354B  | 117608 | HITS-CLIP//PAR-CLIP                            | 1582 | MSI2     | 124540 | Biotin-Microarrays |
| 507. | BORCS7   | 119032 | PAR-CLIP                                       | 1583 | JPH3     | 57338  | Biotin-Microarrays |

|      |          |        |                                           |      |         |        |                    |
|------|----------|--------|-------------------------------------------|------|---------|--------|--------------------|
| 508. | ANKRD9   | 122416 | HITS-CLIP                                 | 1584 | ANKH    | 56172  | Biotin-Microarrays |
| 509. | MRPL52   | 122704 | PAR-CLIP                                  | 1585 | TBRG1   | 84897  | Biotin-Microarrays |
| 510. | GPHB5    | 122876 | Microarray                                | 1586 | ABCA5   | 23461  | Biotin-Microarrays |
| 511. | CYB5D1   | 124637 | HITS-CLIP                                 | 1587 | OBSCN   | 84033  | Biotin-Microarrays |
| 512. | KRBA2    | 124751 | HITS-CLIP                                 | 1588 | LONRF1  | 91694  | Microarrays        |
| 513. | CCDC43   | 124808 | PAR-CLIP                                  | 1589 | PPP1R3A | 5506   | Biotin-Microarrays |
| 514. | ZNF573   | 126231 | HITS-CLIP                                 | 1590 | SH3RF1  | 57630  | Biotin-Microarrays |
| 515. | FBXO27   | 126433 | PAR-CLIP                                  | 1591 | BUB3    | 9184   | CLEAR-CLIP         |
| 516. | RNF19B   | 127544 | HITS-CLIP                                 | 1592 | FGD5    | 152273 | Microarrays        |
| 517. | C1orf122 | 127687 | Microarray                                | 1593 | EME1    | 146956 | Biotin-Microarrays |
| 518. | TSHZ2    | 128553 | HITS-CLIP                                 | 1594 | USP25   | 29761  | Biotin-Microarrays |
| 519. | ACVR1C   | 130399 | Luciferase reporter assay//Reporter assay | 1595 | MIER3   | 166968 | Biotin-Microarrays |
| 520. | CPNE4    | 131034 | Microarray                                | 1596 | RMND1   | 55005  | Biotin-Microarrays |
| 521. | GNPDA2   | 132789 | Microarray                                | 1597 | PSD3    | 23362  | Biotin-Microarrays |
| 522. | ZNF786   | 136051 | HITS-CLIP                                 | 1598 | GNAQ    | 2776   | Biotin-Microarrays |
| 523. | MTPN     | 136319 | Microarray                                | 1599 | DRAM2   | 128338 | PAR-CLIP           |
| 524. | MPLKIP   | 136647 | HITS-CLIP                                 | 1600 | BACH1   | 571    | HITS-CLIP          |
| 525. | PTPDC1   | 138639 | HITS-CLIP                                 | 1601 | BACH1   | 571    | Biotin-Microarrays |
| 526. | DOCK11   | 139818 | PAR-CLIP                                  | 1602 | SCAF4   | 57466  | Biotin-Microarrays |
| 527. | BRI3BP   | 140707 | Microarray                                | 1603 | FGF18   | 8817   | Biotin-Microarrays |
| 528. | SMCR8    | 140775 | PAR-CLIP                                  | 1604 | EEF1A1  | 1915   | Biotin-Microarrays |
| 529. | ROMO1    | 140823 | HITS-CLIP                                 | 1605 | BAG4    | 9530   | Biotin-Microarrays |
| 530. | KDELC2   | 143888 | HITS-CLIP                                 | 1606 | VPS8    | 23355  | Biotin-Microarrays |
| 531. | PTGR2    | 145482 | HITS-CLIP                                 | 1607 | EIF4A2  | 1974   | Biotin-Microarrays |
| 532. | RUNDC1   | 146923 | HITS-CLIP                                 | 1608 | BRPF1   | 7862   | Biotin-Microarrays |
| 533. | BROX     | 148362 | HITS-CLIP                                 | 1609 | ATP2B2  | 491    | CLEAR-CLIP         |
| 534. | TMEM56   | 148534 | HITS-CLIP                                 | 1610 | FZD1    | 8321   | Biotin-Microarrays |
| 535. | DUSP18   | 150290 | HITS-CLIP                                 | 1611 | TMEM164 | 84187  | Microarrays        |
| 536. | FAM117B  | 150864 | Luciferase reporter assay//qRT-PCR        | 1612 | TAB3    | 257397 | Biotin-Microarrays |
| 537. | TCF23    | 150921 | HITS-CLIP                                 | 1613 | SKI     | 6497   | Biotin-Microarrays |
| 538. | GPR155   | 151556 | HITS-CLIP                                 | 1614 | RNF207  | 388591 | Biotin-Microarrays |
| 539. | SGO1     | 151648 | HITS-CLIP                                 | 1615 | RIBC1   | 158787 | Microarrays        |

|      |               |        |                     |      |          |        |                                    |
|------|---------------|--------|---------------------|------|----------|--------|------------------------------------|
| 540. | THAP6         | 152815 | HITS-CLIP           | 1616 | CDA      | 978    | Biotin-Microarrays,<br>Microarrays |
| 541. | SLC38A9       | 153129 | HITS-CLIP           | 1617 | PAXBP1   | 94104  | Biotin-Microarrays                 |
| 542. | METTL27       | 155368 | HITS-CLIP           | 1618 | GART     | 2618   | Biotin-Microarrays                 |
| 543. | TMEM74        | 157753 | Microarray          | 1619 | SON      | 6651   | Biotin-Microarrays                 |
| 544. | FAM120A<br>OS | 158293 | HITS-CLIP           | 1620 | UBE2Z    | 65264  | Biotin-Microarrays                 |
| 545. | PGBD4         | 161779 | HITS-CLIP           | 1621 | RUNX1    | 861    | Biotin-Microarrays                 |
| 546. | ZNF320        | 162967 | PAR-CLIP            | 1622 | CTBP1    | 1487   | Biotin-Microarrays                 |
| 547. | DENND2<br>C   | 163259 | Microarray          | 1623 | ABR      | 29     | Microarrays                        |
| 548. | LCA5          | 167691 | Microarray          | 1624 | WDR4     | 10785  | Biotin-Microarrays                 |
| 549. | FUT11         | 170384 | HITS-CLIP//PAR-CLIP | 1625 | U2AF1    | 7307   | Biotin-Microarrays                 |
| 550. | ZNF431        | 170959 | HITS-CLIP           | 1626 | G6PD     | 2539   | Biotin-Microarrays                 |
| 551. | FAM9B         | 171483 | HITS-CLIP           | 1627 | RRP1     | 8568   | Biotin-Microarrays                 |
| 552. | AGO3          | 192669 | PAR-CLIP            | 1628 | TRAPPC10 | 7109   | Biotin-Microarrays                 |
| 553. | DZIP1L        | 199221 | Microarray          | 1629 | DIP2A    | 23181  | Biotin-Microarrays                 |
| 554. | ALG14         | 199857 | HITS-CLIP           | 1630 | PRMT2    | 3275   | Microarrays                        |
| 555. | IBA57         | 200205 | HITS-CLIP           | 1631 | RDH13    | 112724 | Biotin-Microarrays                 |
| 556. | APOBEC3<br>A  | 200315 | PAR-CLIP            | 1632 | ZER1     | 10444  | Microarrays                        |
| 557. | TRIM65        | 201292 | Microarray          | 1633 | IL6R     | 3570   | Biotin-Microarrays                 |
| 558. | ZSCAN4        | 201516 | Microarray          | 1634 | UBQLN4   | 56893  | Biotin-Microarrays                 |
| 559. | DNAJC18       | 202052 | Microarray          | 1635 | LRRC14   | 9684   | Biotin-Microarrays                 |
| 560. | VMA21         | 203547 | PAR-CLIP            | 1636 | ZNF333   | 84449  | Biotin-Microarrays                 |
| 561. | CDY2B         | 203611 | Microarray          | 1637 | SQSTM1   | 8878   | HITS-CLIP                          |
| 562. | TMEM136       | 219902 | Microarray          | 1638 | SQSTM1   | 8878   | Biotin-Microarrays                 |
| 563. | ZNF485        | 220992 | HITS-CLIP//PAR-CLIP | 1639 | NAPEPLD  | 222236 | Biotin-Microarrays                 |
| 564. | KIF6          | 221458 | HITS-CLIP           | 1640 | SRSF2    | 6427   | HITS-CLIP                          |
| 565. | AKR7L         | 246181 | HITS-CLIP//PAR-CLIP | 1641 | RAVER1   | 125950 | Biotin-Microarrays                 |
| 566. | SLC25A30      | 253512 | Microarray          | 1642 | SEN3     | 26168  | Biotin-Microarrays                 |
| 567. | GK5           | 256356 | HITS-CLIP           | 1643 | EIF4A1   | 1973   | Biotin-Microarrays                 |
| 568. | NALCN         | 259232 | Microarray          | 1644 | WDR90    | 197335 | Biotin-Microarrays                 |
| 569. | FADS6         | 283985 | HITS-CLIP           | 1645 | SYVN1    | 84447  | Biotin-Microarrays                 |
| 570. | NKPD1         | 284353 | HITS-CLIP           | 1646 | LRP5     | 4041   | Microarrays                        |

|      |             |        |            |      |          |        |                                    |
|------|-------------|--------|------------|------|----------|--------|------------------------------------|
| 571. | ZNF841      | 284371 | HITS-CLIP  | 1647 | SLC25A34 | 284723 | Biotin-Microarrays                 |
| 572. | FAM19A3     | 284467 | Microarray | 1648 | RBBP4    | 5928   | Biotin-Microarrays,<br>Microarrays |
| 573. | SEC14L4     | 284904 | PAR-CLIP   | 1649 | CAMK2N1  | 55450  | Biotin-Microarrays                 |
| 574. | RABL3       | 285282 | HITS-CLIP  | 1650 | MEGF6    | 1953   | Biotin-Microarrays                 |
| 575. | XKR6        | 286046 | HITS-CLIP  | 1651 | USP1     | 7398   | PAR-CLIP                           |
| 576. | DPY19L4     | 286148 | HITS-CLIP  | 1652 | FUBP1    | 8880   | Biotin-Microarrays                 |
| 577. | C14orf39    | 317761 | Microarray | 1653 | FLVCR1   | 28982  | Biotin-Microarrays                 |
| 578. | RAB43       | 339122 | PAR-CLIP   | 1654 | RBM15    | 64783  | Biotin-Microarrays                 |
| 579. | ACER2       | 340485 | PAR-CLIP   | 1655 | DHX57    | 90957  | Biotin-Microarrays                 |
| 580. | VSIG1       | 340547 | HITS-CLIP  | 1656 | CCNYL1   | 151195 | Microarrays                        |
| 581. | FMN1        | 342184 | HITS-CLIP  | 1657 | SLC22A15 | 55356  | Biotin-Microarrays                 |
| 582. | SMTNL2      | 342527 | HITS-CLIP  | 1658 | AZI2     | 64343  | Biotin-Microarrays                 |
| 583. | MOGAT3      | 346606 | PAR-CLIP   | 1659 | STT3B    | 201595 | Biotin-Microarrays                 |
| 584. | FAM71F2     | 346653 | HITS-CLIP  | 1660 | IFI16    | 3428   | Biotin-Microarrays                 |
| 585. | ZNF233      | 353355 | Microarray | 1661 | GTPBP8   | 29083  | Microarrays                        |
| 586. | DNAJB13     | 374407 | HITS-CLIP  | 1662 | PTPN13   | 5783   | Biotin-Microarrays                 |
| 587. | ANKRD36     | 375248 | HITS-CLIP  | 1663 | ATXN7    | 6314   | Biotin-Microarrays                 |
| 588. | RBM43       | 375287 | PAR-CLIP   | 1664 | TIPARP   | 25976  | Microarrays                        |
| 589. | C3orf62     | 375341 | HITS-CLIP  | 1665 | SMIM14   | 201895 | Biotin-Microarrays                 |
| 590. | VWC2        | 375567 | PAR-CLIP   | 1666 | RPP14    | 11102  | Biotin-Microarrays                 |
| 591. | ZNF322P1    | 387328 | PAR-CLIP   | 1667 | APBB2    | 323    | Biotin-Microarrays                 |
| 592. | RGS9BP      | 388531 | HITS-CLIP  | 1668 | CRELD1   | 78987  | Biotin-Microarrays                 |
| 593. | FLG2        | 388698 | HITS-CLIP  | 1669 | U2SURP   | 23350  | Biotin-Microarrays                 |
| 594. | PLEKHM<br>3 | 389072 | HITS-CLIP  | 1670 | TTC14    | 151613 | Biotin-Microarrays                 |
| 595. | IYD         | 389434 | HITS-CLIP  | 1671 | LIPH     | 200879 | Microarrays                        |
| 596. | FAM102A     | 399665 | Microarray | 1672 | PBRM1    | 55193  | Biotin-Microarrays                 |
| 597. | ZNF321P     | 399669 | Microarray | 1673 | CDC25A   | 993    | Biotin-Microarrays                 |
| 598. | HACD4       | 401494 | HITS-CLIP  | 1674 | FBXW12   | 285231 | Biotin-Microarrays                 |
| 599. | BCL2L15     | 440603 | HITS-CLIP  | 1675 | MST1R    | 4486   | Biotin-Microarrays                 |
| 600. | CISD2       | 493856 | PAR-CLIP   | 1676 | WDR82    | 80335  | Microarrays                        |
| 601. | AGAP9       | 642517 | HITS-CLIP  | 1677 | TMEM144  | 55314  | Biotin-Microarrays                 |
| 602. | ARIH2OS     | 646450 | HITS-CLIP  | 1678 | NAA15    | 80155  | Microarrays                        |

|      |                |           |                                                            |      |          |        |                                    |
|------|----------------|-----------|------------------------------------------------------------|------|----------|--------|------------------------------------|
| 603. | ZBTB8A         | 653121    | HITS-CLIP                                                  | 1679 | FAM160A1 | 729830 | HITS-CLIP                          |
| 604. | POM121L<br>7P  | 728418    | HITS-CLIP                                                  | 1680 | NIPBL    | 25836  | Biotin-Microarrays                 |
| 605. | SLC35E2<br>B   | 728661    | HITS-CLIP                                                  | 1681 | SLC25A46 | 91137  | PAR-CLIP                           |
| 606. | PRR23A         | 729627    | HITS-CLIP//PAR-CLIP                                        | 1682 | CMBL     | 134147 | Biotin-Microarrays                 |
| 607. | ISPD           | 729920    | HITS-CLIP                                                  | 1683 | WDR41    | 55255  | Biotin-Microarrays                 |
| 608. | LRRC3C         | 100505591 | HITS-CLIP                                                  | 1684 | SCGB3A2  | 117156 | Biotin-Microarrays                 |
| 609. | ARL17B         | 100506084 | HITS-CLIP                                                  | 1685 | ERAP1    | 51752  | Biotin-Microarrays                 |
| 610. | ISY1-<br>RAB43 | 100534599 | PAR-CLIP                                                   | 1686 | RICTOR   | 253260 | Biotin-Microarrays                 |
| 611. | ABL2           | 27        | HITS-CLIP//PAR-CLIP                                        | 1687 | ANKRA2   | 57763  | Microarrays                        |
| 612. | AMD1           | 262       | PAR-CLIP                                                   | 1688 | FOXQ1    | 94234  | Microarrays                        |
| 613. | CKS1B          | 1163      | PAR-CLIP                                                   | 1689 | CREBRF   | 153222 | Microarrays                        |
| 614. | FCAR           | 2204      | PAR-CLIP                                                   | 1690 | SFXN1    | 94081  | Biotin-Microarrays                 |
| 615. | FUT1           | 2523      | ELISA//Luciferase reporter<br>assay//qRT-PCR//Western blot | 1691 | STXBP5   | 134957 | Biotin-Microarrays                 |
| 616. | GRK4           | 2868      | HITS-CLIP                                                  | 1692 | TRA2A    | 29896  | Biotin-Microarrays                 |
| 617. | HMGB1          | 3146      | HITS-CLIP                                                  | 1693 | SAP30L   | 79685  | Biotin-Microarrays                 |
| 618. | ITGAX          | 3687      | PAR-CLIP                                                   | 1694 | ZNF12    | 7559   | Biotin-Microarrays                 |
| 619. | KARS           | 3735      | HITS-CLIP                                                  | 1695 | CTSB     | 1508   | Biotin-Microarrays                 |
| 620. | KCNJ6          | 3763      | HITS-CLIP                                                  | 1696 | SPAG11B  | 10407  | Biotin-Microarrays                 |
| 621. | LETM1          | 3954      | PAR-CLIP                                                   | 1697 | RASEF    | 158158 | Biotin-Microarrays                 |
| 622. | NQO2           | 4835      | HITS-CLIP                                                  | 1698 | STRBP    | 55342  | Biotin-Microarrays                 |
| 623. | PFAS           | 5198      | PAR-CLIP                                                   | 1699 | GAPVD1   | 26130  | HITS-CLIP                          |
| 624. | RAB3B          | 5865      | HITS-CLIP                                                  | 1700 | TRMT10B  | 158234 | Biotin-Microarrays                 |
| 625. | RAB27A         | 5873      | HITS-CLIP                                                  | 1701 | BRWD3    | 254065 | Microarrays                        |
| 626. | RAD51          | 5888      | PAR-CLIP                                                   | 1702 | PGM2L1   | 283209 | Biotin-Microarrays,<br>Microarrays |
| 627. | RPL34          | 6164      | HITS-CLIP                                                  | 1703 | ZNF22    | 7570   | Biotin-Microarrays                 |
| 628. | SHMT1          | 6470      | PAR-CLIP                                                   | 1704 | EML5     | 161436 | Biotin-Microarrays                 |
| 629. | SOAT1          | 6646      | PAR-CLIP                                                   | 1705 | NEMF     | 9147   | Biotin-Microarrays                 |
| 630. | WNT2B          | 7482      | HITS-CLIP                                                  | 1706 | ARF6     | 382    | HITS-CLIP                          |
| 631. | ZNF91          | 7644      | HITS-CLIP//PAR-CLIP                                        | 1707 | BEND7    | 222389 | Biotin-Microarrays                 |
| 632. | ALDH5A1        | 7915      | HITS-CLIP                                                  | 1708 | NSD1     | 64324  | Biotin-Microarrays                 |



|      |           |       |                                                                      |      |          |        |                                 |
|------|-----------|-------|----------------------------------------------------------------------|------|----------|--------|---------------------------------|
| 633. | APOL1     | 8542  | HITS-CLIP                                                            | 1709 | TSC1     | 7248   | Biotin-Microarrays              |
| 634. | PLPP3     | 8613  | HITS-CLIP                                                            | 1710 | METTL3   | 56339  | Biotin-Microarrays              |
| 635. | LATS1     | 9113  | HITS-CLIP                                                            | 1711 | TC2N     | 123036 | CLEAR-CLIP                      |
| 636. | SLC28A2   | 9153  | PAR-CLIP                                                             | 1712 | IFI27    | 3429   | Microarrays                     |
| 637. | SNAP29    | 9342  | HITS-CLIP                                                            | 1713 | NELL1    | 4745   | Microarrays                     |
| 638. | SEMA3E    | 9723  | HITS-CLIP                                                            | 1714 | KCNC2    | 3747   | CLEAR-CLIP                      |
| 639. | CCS       | 9973  | HITS-CLIP//PAR-CLIP                                                  | 1715 | TAF1D    | 79101  | Biotin-Microarrays              |
| 640. | ZNF275    | 10838 | PAR-CLIP                                                             | 1716 | SPRED1   | 161742 | Luciferase Reporter Assay       |
| 641. | ZFP30     | 22835 | HITS-CLIP                                                            | 1717 | CLMP     | 79827  | Microarrays                     |
| 642. | PLEKHG3   | 26030 | PAR-CLIP                                                             | 1718 | STXBP4   | 252983 | Biotin-Microarrays              |
| 643. | MTG2      | 26164 | HITS-CLIP                                                            | 1719 | WBP1L    | 54838  | Biotin-Microarrays              |
| 644. | MCAT      | 27349 | Luciferase reporter assay//Next Generation Sequencing (NGS)//qRT-PCR | 1720 | ANAPC16  | 119504 | Biotin-Microarrays              |
| 645. | WDPCP     | 51057 | HITS-CLIP                                                            | 1721 | TRIM44   | 54765  | Microarrays                     |
| 646. | TAS2R5    | 54429 | HITS-CLIP                                                            | 1722 | TPP1     | 1200   | Biotin-Microarrays              |
| 647. | TMEM106 B | 54664 | HITS-CLIP                                                            | 1723 | NETO1    | 81832  | Biotin-Microarrays              |
| 648. | PGPEP1    | 54858 | PAR-CLIP                                                             | 1724 | AKIP1    | 56672  | Biotin-Microarrays              |
| 649. | MRM3      | 55178 | HITS-CLIP                                                            | 1725 | ATMIN    | 23300  | Biotin-Microarrays, Microarrays |
| 650. | SVOP      | 55530 | HITS-CLIP                                                            | 1726 | TMX3     | 54495  | Biotin-Microarrays, Microarrays |
| 651. | CABP4     | 57010 | HITS-CLIP                                                            | 1727 | CCDC68   | 80323  | Microarrays                     |
| 652. | TIGAR     | 57103 | PAR-CLIP                                                             | 1728 | RIMKLB   | 57494  | Biotin-Microarrays              |
| 653. | SHROOM 4  | 57477 | HITS-CLIP                                                            | 1729 | HSP90B1  | 7184   | Biotin-Microarrays              |
| 654. | FANCM     | 57697 | HITS-CLIP                                                            | 1730 | B2M      | 567    | Biotin-Microarrays              |
| 655. | GTDC1     | 79712 | HITS-CLIP                                                            | 1731 | CASC4    | 113201 | Biotin-Microarrays              |
| 656. | CLMP      | 79827 | HITS-CLIP                                                            | 1732 | AP1G1    | 164    | Biotin-Microarrays              |
| 657. | ZMYM1     | 79830 | HITS-CLIP//PAR-CLIP                                                  | 1733 | SLFN5    | 162394 | Biotin-Microarrays              |
| 658. | NOL10     | 79954 | HITS-CLIP                                                            | 1734 | CATSPER2 | 117155 | Biotin-Microarrays              |
| 659. | ORAI2     | 80228 | HITS-CLIP                                                            | 1735 | ANPEP    | 290    | Biotin-Microarrays              |
| 660. | KREMEN 1  | 83999 | HITS-CLIP                                                            | 1736 | C18orf54 | 162681 | Biotin-Microarrays              |

|      |              |        |                                    |      |          |        |                                    |
|------|--------------|--------|------------------------------------|------|----------|--------|------------------------------------|
| 661. | MYPN         | 84665  | HITS-CLIP                          | 1737 | NAB2     | 4665   | Biotin-Microarrays                 |
| 662. | PRPF38A      | 84950  | HITS-CLIP//PAR-CLIP                | 1738 | PATL1    | 219988 | Biotin-Microarrays                 |
| 663. | ZNF682       | 91120  | HITS-CLIP                          | 1739 | ACSF2    | 80221  | CLEAR-CLIP                         |
| 664. | ACBD5        | 91452  | PAR-CLIP                           | 1740 | MIDN     | 90007  | Biotin-Microarrays                 |
| 665. | GBP4         | 115361 | HITS-CLIP                          | 1741 | ZNF641   | 121274 | Biotin-Microarrays                 |
| 666. | LRRC58       | 116064 | HITS-CLIP                          | 1742 | TUBA1A   | 7846   | Microarrays                        |
| 667. | WDR92        | 116143 | HITS-CLIP                          | 1743 | PSCA     | 8000   | Biotin-Microarrays                 |
| 668. | LRG1         | 116844 | HITS-CLIP                          | 1744 | TSR1     | 55720  | Biotin-Microarrays                 |
| 669. | RNF19B       | 127544 | HITS-CLIP                          | 1745 | KLK13    | 26085  | Biotin-Microarrays                 |
| 670. | MIPOL1       | 145282 | HITS-CLIP                          | 1746 | ANGPTL4  | 51129  | Biotin-Microarrays,<br>Microarrays |
| 671. | CCBE1        | 147372 | HITS-CLIP                          | 1747 | PRDX2    | 7001   | Biotin-Microarrays                 |
| 672. | DENND5<br>B  | 160518 | HITS-CLIP                          | 1748 | RAB26    | 25837  | Biotin-Microarrays                 |
| 673. | TPCN2        | 219931 | HITS-CLIP                          | 1749 | SRRM2    | 23524  | Biotin-Microarrays                 |
| 674. | ZDHHC24      | 254359 | PAR-CLIP                           | 1750 | SF1      | 7536   | Biotin-Microarrays                 |
| 675. | PROSER2      | 254427 | PAR-CLIP                           | 1751 | SCARA3   | 51435  | Biotin-Microarrays                 |
| 676. | GATC         | 283459 | HITS-CLIP                          | 1752 | SETD5    | 55209  | Biotin-Microarrays                 |
| 677. | ZNF843       | 283933 | HITS-CLIP                          | 1753 | DNAJC7   | 7266   | Biotin-Microarrays                 |
| 678. | ZNF283       | 284349 | HITS-CLIP                          | 1754 | IRF2BP2  | 359948 | HITS-CLIP                          |
| 679. | ARL10        | 285598 | HITS-CLIP                          | 1755 | PXK      | 54899  | Biotin-Microarrays                 |
| 680. | RBM43        | 375287 | HITS-CLIP                          | 1756 | SCN11A   | 11280  | Biotin-Microarrays                 |
| 681. | ERCC6L2      | 375748 | PAR-CLIP                           | 1757 | ATXN2L   | 11273  | Biotin-Microarrays                 |
| 682. | NOTCH2<br>NL | 388677 | HITS-CLIP                          | 1758 | GBX2     | 2637   | Microarrays                        |
| 683. | GTF2H5       | 404672 | HITS-CLIP                          | 1759 | ZNF30    | 90075  | Biotin-Microarrays                 |
| 684. | GXYLT2       | 727936 | HITS-CLIP                          | 1760 | IL7R     | 3575   | Biotin-Microarrays                 |
| 685. | NFYA         | 4800   | Biotin-Microarrays                 | 1761 | NPNT     | 255743 | Biotin-Microarrays                 |
| 686. | CFLAR        | 8837   | Biotin-Microarrays                 | 1762 | SEMA4C   | 54910  | Microarrays                        |
| 687. | TFPI         | 7035   | Biotin-Microarrays,<br>Microarrays | 1763 | IL12A    | 3592   | Biotin-Microarrays                 |
| 688. | NDUFAF7      | 55471  | Biotin-Microarrays                 | 1764 | MAT2A    | 4144   | HITS-CLIP                          |
| 689. | MTMR7        | 9108   | Biotin-Microarrays                 | 1765 | COL4A3   | 1285   | Biotin-Microarrays                 |
| 690. | RBM6         | 10180  | Biotin-Microarrays                 | 1766 | GOT1L1   | 137362 | Biotin-Microarrays                 |
| 691. | POLR2J       | 5439   | Biotin-Microarrays                 | 1767 | TBC1D10B | 26000  | Microarrays                        |

|      |              |       |                                              |      |          |        |                               |
|------|--------------|-------|----------------------------------------------|------|----------|--------|-------------------------------|
| 692. | FAM214B      | 80256 | Biotin-Microarrays                           | 1768 | MMGT1    | 93380  | Microarrays                   |
| 693. | CROT         | 54677 | Microarrays                                  | 1769 | ZEB2     | 9839   | Biotin-Microarrays, HITS-CLIP |
| 694. | KMT2E        | 55904 | Biotin-Microarrays                           | 1770 | GKN1     | 56287  | Biotin-Microarrays            |
| 695. | ZNF195       | 7748  | Biotin-Microarrays                           | 1771 | C15orf40 | 123207 | Biotin-Microarrays            |
| 696. | MYCBP2       | 23077 | Biotin-Microarrays                           | 1772 | HIC2     | 23119  | Biotin-Microarrays            |
| 697. | FBXL3        | 26224 | Biotin-Microarrays                           | 1773 | ZNF32    | 7580   | Microarrays                   |
| 698. | ETV1         | 2115  | Biotin-Microarrays                           | 1774 | UGP2     | 7360   | Biotin-Microarrays            |
| 699. | PHTF2        | 57157 | Biotin-Microarrays                           | 1775 | PCDH7    | 5099   | Biotin-Microarrays            |
| 700. | MYLIP        | 29116 | Biotin-Microarrays                           | 1776 | MUC3A    | 4584   | HITS-CLIP                     |
| 701. | E2F2         | 1870  | Biotin-Microarrays                           | 1777 | KLF13    | 51621  | Biotin-Microarrays            |
| 702. | JARID2       | 3720  | Biotin-Microarrays                           | 1778 | TMEM154  | 201799 | PAR-CLIP                      |
| 703. | DLEC1        | 9940  | Biotin-Microarrays                           | 1779 | ALCAM    | 214    | Biotin-Microarrays            |
| 704. | CYB561       | 1534  | Biotin-Microarrays                           | 1780 | HNRNPA3  | 220988 | Biotin-Microarrays            |
| 705. | CELSR3       | 1951  | Biotin-Microarrays                           | 1781 | RNF150   | 57484  | Biotin-Microarrays            |
| 706. | REV3L        | 5980  | Biotin-Microarrays                           | 1782 | USP47    | 55031  | Biotin-Microarrays            |
| 707. | POMT2        | 29954 | Biotin-Microarrays                           | 1783 | FAM161A  | 84140  | Biotin-Microarrays            |
| 708. | ZNF207       | 7756  | Biotin-Microarrays                           | 1784 | TMED10   | 10972  | Biotin-Microarrays, PAR-CLIP  |
| 709. | CD9          | 928   | Biotin-Microarrays                           | 1785 | SMAD1    | 4086   | Biotin-Microarrays            |
| 710. | IFFO1        | 25900 | Biotin-Microarrays                           | 1786 | SP7      | 121340 | Microarrays                   |
| 711. | NISCH        | 11188 | Biotin-Microarrays                           | 1787 | STAT2    | 6773   | Microarrays                   |
| 712. | SCMH1        | 22955 | PAR-CLIP, Biotin-Microarrays,<br>Microarrays | 1788 | RNF34    | 80196  | Biotin-Microarrays            |
| 713. | MRC2         | 9902  | Biotin-Microarrays                           | 1789 | POLH     | 5429   | Biotin-Microarrays            |
| 714. | AKAP8L       | 26993 | Biotin-Microarrays                           | 1790 | AKAP13   | 11214  | Biotin-Microarrays            |
| 715. | PIK3C2A      | 5286  | Biotin-Microarrays                           | 1791 | USP32    | 84669  | Biotin-Microarrays            |
| 716. | DCN          | 1634  | Biotin-Microarrays                           | 1792 | KIAA0232 | 9778   | Biotin-Microarrays            |
| 717. | ERCC1        | 2067  | Biotin-Microarrays                           | 1793 | TMEM43   | 79188  | Biotin-Microarrays            |
| 718. | CLK1         | 1195  | Biotin-Microarrays                           | 1794 | OSCAR    | 126014 | Biotin-Microarrays            |
| 719. | DNASE1L<br>1 | 1774  | PAR-CLIP                                     | 1795 | TANC2    | 26115  | Biotin-Microarrays            |
| 720. | CAPN1        | 823   | Biotin-Microarrays                           | 1796 | PKIA     | 5569   | Biotin-Microarrays            |
| 721. | ACPP         | 55    | Microarrays                                  | 1797 | MTM1     | 4534   | Microarrays                   |
| 722. | MDH1         | 4190  | Biotin-Microarrays                           | 1798 | TRMT61B  | 55006  | PAR-CLIP                      |
| 723. | ISL1         | 3670  | Biotin-Microarrays                           | 1799 | INSR     | 3643   | Biotin-Microarrays            |

|      |         |        |                                    |      |          |        |                              |
|------|---------|--------|------------------------------------|------|----------|--------|------------------------------|
| 724. | RUFY3   | 22902  | Biotin-Microarrays                 | 1800 | C9orf16  | 79095  | Biotin-Microarrays           |
| 725. | CXorf56 | 63932  | Biotin-Microarrays,<br>Microarrays | 1801 | ZNF692   | 55657  | Biotin-Microarrays           |
| 726. | TTC27   | 55622  | Biotin-Microarrays                 | 1802 | SHCBP1   | 79801  | Microarrays                  |
| 727. | CPS1    | 1373   | Biotin-Microarrays                 | 1803 | CHD7     | 55636  | Biotin-Microarrays           |
| 728. | ABCC2   | 1244   | Biotin-Microarrays                 | 1804 | ESCO2    | 157570 | Biotin-Microarrays           |
| 729. | PHF20   | 51230  | HITS-CLIP, Biotin-Microarrays      | 1805 | ASXL1    | 171023 | Biotin-Microarrays           |
| 730. | CD44    | 960    | Biotin-Microarrays                 | 1806 | RSL1D1   | 26156  | HITS-CLIP                    |
| 731. | BTN3A1  | 11119  | Biotin-Microarrays                 | 1807 | ZNF274   | 10782  | Biotin-Microarrays           |
| 732. | VEZT    | 55591  | Biotin-Microarrays                 | 1808 | PIK3CD   | 5293   | Biotin-Microarrays           |
| 733. | BCLAF1  | 9774   | Biotin-Microarrays                 | 1809 | SPSB1    | 80176  | Biotin-Microarrays           |
| 734. | ANK1    | 286    | Biotin-Microarrays                 | 1810 | ATF7IP   | 55729  | Biotin-Microarrays           |
| 735. | ZCCHC8  | 55596  | Biotin-Microarrays                 | 1811 | PWWP2B   | 170394 | Biotin-Microarrays           |
| 736. | UBA6    | 55236  | Biotin-Microarrays, PAR-CLIP       | 1812 | MLLT3    | 4300   | Biotin-Microarrays           |
| 737. | PEX3    | 8504   | Biotin-Microarrays                 | 1813 | JMJD1C   | 221037 | PAR-CLIP, Biotin-Microarrays |
| 738. | CUL3    | 8452   | PAR-CLIP                           | 1814 | SMN1     | 6606   | Biotin-Microarrays           |
| 739. | BOD1L1  | 259282 | Biotin-Microarrays                 | 1815 | NME6     | 10201  | Biotin-Microarrays           |
| 740. | TLL1    | 7092   | Biotin-Microarrays                 | 1816 | CYCS     | 54205  | Biotin-Microarrays           |
| 741. | TRIO    | 7204   | Biotin-Microarrays                 | 1817 | TEFM     | 79736  | Biotin-Microarrays           |
| 742. | CDH1    | 999    | Microarrays                        | 1818 | ISG20    | 3669   | Microarrays                  |
| 743. | ZFYVE16 | 9765   | Biotin-Microarrays                 | 1819 | ID4      | 3400   | Biotin-Microarrays           |
| 744. | PARP3   | 10039  | HITS-CLIP                          | 1820 | ZNF131   | 7690   | Biotin-Microarrays           |
| 745. | MED17   | 9440   | Biotin-Microarrays                 | 1821 | TP53RK   | 112858 | Biotin-Microarrays           |
| 746. | DCUN1D1 | 54165  | Biotin-Microarrays                 | 1822 | MANEA    | 79694  | Biotin-Microarrays           |
| 747. | PHKA2   | 5256   | Biotin-Microarrays                 | 1823 | AFF1     | 4299   | PAR-CLIP                     |
| 748. | EPHA3   | 2042   | Biotin-Microarrays                 | 1824 | DCP2     | 167227 | Biotin-Microarrays           |
| 749. | DSG2    | 1829   | Biotin-Microarrays                 | 1825 | RPL38    | 6169   | Biotin-Microarrays           |
| 750. | OFD1    | 8481   | Biotin-Microarrays                 | 1826 | CES2     | 8824   | Biotin-Microarrays           |
| 751. | GPM6B   | 2824   | Biotin-Microarrays                 | 1827 | ANKRD13D | 338692 | Biotin-Microarrays           |
| 752. | TPR     | 7175   | Biotin-Microarrays                 | 1828 | HECTD4   | 283450 | Biotin-Microarrays           |
| 753. | GOPC    | 57120  | Biotin-Microarrays                 | 1829 | FAM222B  | 55731  | Biotin-Microarrays           |
| 754. | MRPS10  | 55173  | Microarrays                        | 1830 | BNC2     | 54796  | PAR-CLIP                     |
| 755. | VPS13D  | 55187  | Biotin-Microarrays, HITS-CLIP      | 1831 | KDM2A    | 22992  | Biotin-Microarrays           |
| 756. | ADAMTS  | 11174  | Biotin-Microarrays                 | 1832 | RAPH1    | 65059  | HITS-CLIP                    |

|      |              |       |                                    |      |          |        |                                    |
|------|--------------|-------|------------------------------------|------|----------|--------|------------------------------------|
|      | 6            |       |                                    |      |          |        |                                    |
| 757. | LTBP1        | 4052  | Biotin-Microarrays                 | 1833 | RAPH1    | 65059  | Biotin-Microarrays                 |
| 758. | NFE2L3       | 9603  | Biotin-Microarrays                 | 1834 | VANGL1   | 81839  | Biotin-Microarrays                 |
| 759. | LIMA1        | 51474 | Biotin-Microarrays                 | 1835 | SLC2A14  | 144195 | Biotin-Microarrays                 |
| 760. | LAMC3        | 10319 | Biotin-Microarrays                 | 1836 | MMRN2    | 79812  | Biotin-Microarrays                 |
| 761. | MPHOSP<br>H9 | 10198 | Biotin-Microarrays                 | 1837 | CHD2     | 1106   | Biotin-Microarrays                 |
| 762. | SIKE1        | 80143 | Biotin-Microarrays                 | 1838 | NMNAT1   | 64802  | Biotin-Microarrays                 |
| 763. | TTC17        | 55761 | Biotin-Microarrays                 | 1839 | HEG1     | 57493  | Biotin-Microarrays                 |
| 764. | FOXN3        | 1112  | Biotin-Microarrays                 | 1840 | RNF213   | 57674  | Biotin-Microarrays                 |
| 765. | THRAP3       | 9967  | Biotin-Microarrays                 | 1841 | NET1     | 10276  | PAR-CLIP                           |
| 766. | SDCCAG8      | 10806 | Biotin-Microarrays                 | 1842 | RBM4     | 5936   | Biotin-Microarrays                 |
| 767. | KIF1B        | 23095 | CLEAR-CLIP                         | 1843 | XXYLT1   | 152002 | Biotin-Microarrays,<br>Microarrays |
| 768. | TBC1D22<br>A | 25771 | Microarrays                        | 1844 | UBXN2A   | 165324 | Biotin-Microarrays                 |
| 769. | SYNE2        | 23224 | Biotin-Microarrays                 | 1845 | FBXO45   | 200933 | Biotin-Microarrays                 |
| 770. | PLEKHH1      | 57475 | Biotin-Microarrays                 | 1846 | C12orf66 | 144577 | Biotin-Microarrays                 |
| 771. | CHRD2        | 25884 | Microarrays                        | 1847 | ZHX3     | 23051  | Biotin-Microarrays                 |
| 772. | SZRD1        | 26099 | HITS-CLIP                          | 1848 | RPL4     | 6124   | HITS-CLIP                          |
| 773. | KMT2C        | 58508 | Biotin-Microarrays                 | 1849 | ANKRD36C | 400986 | CLEAR-CLIP                         |
| 774. | RC3H2        | 54542 | Biotin-Microarrays                 | 1850 | AKIRIN1  | 79647  | HITS-CLIP                          |
| 775. | SOAT1        | 6646  | CLEAR-CLIP, Microarrays            | 1851 | ANGEL2   | 90806  | Biotin-Microarrays                 |
| 776. | TMCC3        | 57458 | HITS-CLIP, Biotin-Microarrays      | 1852 | FZD4     | 8322   | Microarrays                        |
| 777. | ZC3H11A      | 9877  | Biotin-Microarrays                 | 1853 | GLMN     | 11146  | Biotin-Microarrays                 |
| 778. | WNK1         | 65125 | Biotin-Microarrays                 | 1854 | DHX36    | 170506 | Biotin-Microarrays                 |
| 779. | CCAR1        | 55749 | Biotin-Microarrays,<br>Microarrays | 1855 | CADM2    | 253559 | Biotin-Microarrays                 |
| 780. | QSER1        | 79832 | Biotin-Microarrays                 | 1856 | DDIT3    | 1649   | Microarrays                        |
| 781. | ELMO2        | 63916 | HITS-CLIP                          | 1857 | ARHGAP1  | 392    | Microarrays                        |
| 782. | VMP1         | 81671 | PAR-CLIP                           | 1858 | GOLGA8A  | 23015  | Biotin-Microarrays                 |
| 783. | AHRR         | 57491 | Microarrays                        | 1859 | PHYKPL   | 85007  | Biotin-Microarrays                 |
| 784. | LIMCH1       | 22998 | Biotin-Microarrays,<br>Microarrays | 1860 | SMAD2    | 4087   | PAR-CLIP                           |
| 785. | HIPK2        | 28996 | Biotin-Microarrays                 | 1861 | CCDC14   | 64770  | Biotin-Microarrays                 |

|      |                |        |                    |      |         |        |                    |
|------|----------------|--------|--------------------|------|---------|--------|--------------------|
| 786. | LPAR2          | 9170   | Biotin-Microarrays | 1862 | B3GALT6 | 126792 | Biotin-Microarrays |
| 787. | SUGP2          | 10147  | Biotin-Microarrays | 1863 | JAKMIP2 | 9832   | Biotin-Microarrays |
| 788. | EYA2           | 2139   | Microarrays        | 1864 | HSF5    | 124535 | Biotin-Microarrays |
| 789. | ANKS1A         | 23294  | Microarrays        | 1865 | ENTHD1  | 150350 | Biotin-Microarrays |
| 790. | PKN2           | 5586   | HITS-CLIP          | 1866 | RTTN    | 25914  | Biotin-Microarrays |
| 791. | SPEN           | 23013  | Biotin-Microarrays | 1867 | SLC35G1 | 159371 | Microarrays        |
| 792. | MYLK           | 4638   | Biotin-Microarrays | 1868 | EID2B   | 126272 | Biotin-Microarrays |
| 793. | CDK13          | 8621   | Biotin-Microarrays | 1869 | SYNE3   | 161176 | HITS-CLIP          |
| 794. | MTHFD2         | 10797  | Microarrays        | 1870 | LPCAT4  | 254531 | Biotin-Microarrays |
| 795. | ASPM           | 259266 | Biotin-Microarrays | 1871 | SLCO3A1 | 28232  | Biotin-Microarrays |
| 796. | EVI5           | 7813   | Biotin-Microarrays | 1872 | PRR15   | 222171 | Microarrays        |
| 797. | CBFB           | 865    | Microarrays        | 1873 | MYO1D   | 4642   | Biotin-Microarrays |
| 798. | HEATR6         | 63897  | Biotin-Microarrays | 1874 | CDK5R1  | 8851   | Biotin-Microarrays |
| 799. | PSME4          | 23198  | Biotin-Microarrays | 1875 | WSB2    | 55884  | Biotin-Microarrays |
| 800. | RORA           | 6095   | Biotin-Microarrays | 1876 | CHD9    | 80205  | Biotin-Microarrays |
| 801. | NUCB2          | 4925   | Biotin-Microarrays | 1877 | TGIF1   | 7050   | Biotin-Microarrays |
| 802. | TMEM260        | 54916  | Biotin-Microarrays | 1878 | RPLP2   | 6181   | Biotin-Microarrays |
| 803. | MNT            | 4335   | Biotin-Microarrays | 1879 | CSTF2T  | 23283  | Microarrays        |
| 804. | ST6GALN<br>AC1 | 55808  | Microarrays        | 1880 | AGTRAP  | 57085  | Microarrays        |
| 805. | OSBPL3         | 26031  | Biotin-Microarrays | 1881 | ZNF518A | 9849   | Biotin-Microarrays |
| 806. | RAD18          | 56852  | PAR-CLIP           | 1882 | ZNF619  | 285267 | CLEAR-CLIP         |
| 807. | ATP2B1         | 490    | Biotin-Microarrays | 1883 | ZBTB41  | 360023 | PAR-CLIP           |
| 808. | MAP4K4         | 9448   | Biotin-Microarrays | 1884 | DDX10   | 1662   | Biotin-Microarrays |
| 809. | MBD3           | 53615  | Biotin-Microarrays | 1885 | DALRD3  | 55152  | Biotin-Microarrays |
| 810. | RDH11          | 51109  | Biotin-Microarrays | 1886 | LCORL   | 254251 | Biotin-Microarrays |
| 811. | LNX1           | 84708  | Biotin-Microarrays | 1887 | GALNT11 | 63917  | Biotin-Microarrays |
| 812. | AFF4           | 27125  | Biotin-Microarrays | 1888 | GEN1    | 348654 | Biotin-Microarrays |
| 813. | NDE1           | 54820  | Biotin-Microarrays | 1889 | DNAJC22 | 79962  | Biotin-Microarrays |
| 814. | ALPK1          | 80216  | Biotin-Microarrays | 1890 | OTOS    | 150677 | Biotin-Microarrays |
| 815. | ST6GAL1        | 6480   | Microarrays        | 1891 | ZNF713  | 349075 | Biotin-Microarrays |
| 816. | CLNS1A         | 1207   | Biotin-Microarrays | 1892 | SUZ12   | 23512  | Biotin-Microarrays |
| 817. | CA12           | 771    | Biotin-Microarrays | 1893 | KCTD12  | 115207 | Biotin-Microarrays |
| 818. | NUAK1          | 9891   | Biotin-Microarrays | 1894 | ZBTB7A  | 51341  | Biotin-Microarrays |

|      |              |        |                    |      |          |        |                    |
|------|--------------|--------|--------------------|------|----------|--------|--------------------|
| 819. | ZNF532       | 55205  | Biotin-Microarrays | 1895 | AURKB    | 9212   | Biotin-Microarrays |
| 820. | ANO8         | 57719  | Microarrays        | 1896 | FAM133A  | 286499 | Biotin-Microarrays |
| 821. | GTSE1        | 51512  | Biotin-Microarrays | 1897 | DAND5    | 199699 | Biotin-Microarrays |
| 822. | SEMA3C       | 10512  | Microarrays        | 1898 | PTPN11   | 5781   | Biotin-Microarrays |
| 823. | ZNF638       | 27332  | Biotin-Microarrays | 1899 | PACS2    | 23241  | Biotin-Microarrays |
| 824. | SLC25A40     | 55972  | Biotin-Microarrays | 1900 | ARL14    | 80117  | Microarrays        |
| 825. | RASAL2       | 9462   | Biotin-Microarrays | 1901 | FLJ37453 | 729614 | Biotin-Microarrays |
| 826. | MARK3        | 4140   | Biotin-Microarrays | 1902 | PDXDC1   | 23042  | Biotin-Microarrays |
| 827. | FNDC3B       | 64778  | Biotin-Microarrays | 1903 | TMEM86B  | 255043 | Biotin-Microarrays |
| 828. | FRYL         | 285527 | Biotin-Microarrays | 1904 | EXOC3    | 11336  | Biotin-Microarrays |
| 829. | ACTB         | 60     | Biotin-Microarrays | 1905 | ZNF816   | 125893 | Microarrays        |
| 830. | PLD1         | 5337   | Biotin-Microarrays | 1906 | RNF182   | 221687 | Microarrays        |
| 831. | DLG1         | 1739   | Biotin-Microarrays | 1907 | C3orf22  | 152065 | Biotin-Microarrays |
| 832. | MKRN2        | 23609  | Biotin-Microarrays | 1908 | HOXC9    | 3225   | Biotin-Microarrays |
| 833. | PLXNA2       | 5362   | Biotin-Microarrays | 1909 | OXTR     | 5021   | Biotin-Microarrays |
| 834. | ANKRD13<br>A | 88455  | Biotin-Microarrays | 1910 | SLC26A11 | 284129 | Biotin-Microarrays |
| 835. | ACACB        | 32     | Biotin-Microarrays | 1911 | TMEM102  | 284114 | PAR-CLIP           |
| 836. | TRAF4        | 9618   | Biotin-Microarrays | 1912 | SGSH     | 6448   | Biotin-Microarrays |
| 837. | IL4R         | 3566   | Microarrays        | 1913 | GPR135   | 64582  | Biotin-Microarrays |
| 838. | USP33        | 23032  | Biotin-Microarrays | 1914 | TNFSF15  | 9966   | Biotin-Microarrays |
| 839. | SNRPA        | 6626   | PAR-CLIP           | 1915 | RELL1    | 768211 | Biotin-Microarrays |
| 840. | FGFR1        | 2260   | Biotin-Microarrays | 1916 | C5orf24  | 134553 | Biotin-Microarrays |
| 841. | MAP2         | 4133   | Biotin-Microarrays | 1917 | CHST15   | 51363  | Microarrays        |
| 842. | PIAS2        | 9063   | Biotin-Microarrays | 1918 | TNRC18   | 84629  | Biotin-Microarrays |
| 843. | PIK3C3       | 5289   | Biotin-Microarrays | 1919 | ZNF708   | 7562   | Biotin-Microarrays |
| 844. | CBFA2T2      | 9139   | Biotin-Microarrays | 1920 | EXT1     | 2131   | Biotin-Microarrays |
| 845. | TP73         | 7161   | Biotin-Microarrays | 1921 | YBEY     | 54059  | Biotin-Microarrays |
| 846. | XRCC5        | 7520   | Biotin-Microarrays | 1922 | PLCXD1   | 55344  | Biotin-Microarrays |
| 847. | MKNK1        | 8569   | Biotin-Microarrays | 1923 | EXOC7    | 23265  | Biotin-Microarrays |
| 848. | TNS1         | 7145   | Biotin-Microarrays | 1924 | CEP97    | 79598  | Biotin-Microarrays |
| 849. | RAPGEF3      | 10411  | Microarrays        | 1925 | SATB1    | 6304   | Biotin-Microarrays |
| 850. | FDFT1        | 2222   | Biotin-Microarrays | 1926 | TRAK1    | 22906  | Biotin-Microarrays |
| 851. | OPHN1        | 4983   | Biotin-Microarrays | 1927 | TTC3     | 7267   | Biotin-Microarrays |

|      |        |       |                              |      |          |        |                    |
|------|--------|-------|------------------------------|------|----------|--------|--------------------|
| 852. | RIMS1  | 22999 | Biotin-Microarrays           | 1928 | PAPPA    | 5069   | Biotin-Microarrays |
| 853. | RIF1   | 55183 | Biotin-Microarrays           | 1929 | RPL35A   | 6165   | Biotin-Microarrays |
| 854. | CNOT4  | 4850  | Biotin-Microarrays           | 1930 | EWSR1    | 2130   | Biotin-Microarrays |
| 855. | DLGAP4 | 22839 | Biotin-Microarrays           | 1931 | BCOR     | 54880  | Biotin-Microarrays |
| 856. | CFHR2  | 3080  | Biotin-Microarrays           | 1932 | KIAA2026 | 158358 | Biotin-Microarrays |
| 857. | RSBN1  | 54665 | Biotin-Microarrays           | 1933 | ASB7     | 140460 | Biotin-Microarrays |
| 858. | OSTM1  | 28962 | Biotin-Microarrays           | 1934 | TANGO2   | 128989 | Microarrays        |
| 859. | ARG2   | 384   | Microarrays                  | 1935 | SFXN4    | 119559 | Biotin-Microarrays |
| 860. | ATP8B1 | 5205  | Biotin-Microarrays           | 1936 | IQGAP3   | 128239 | Biotin-Microarrays |
| 861. | ME2    | 4200  | Microarrays                  | 1937 | PTP4A2   | 8073   | Microarrays        |
| 862. | CCNT2  | 905   | Biotin-Microarrays           | 1938 | DENND5A  | 23258  | Biotin-Microarrays |
| 863. | COBLL1 | 22837 | Microarrays                  | 1939 | EIF3C    | 8663   | Biotin-Microarrays |
| 864. | GSK3B  | 2932  | HITS-CLIP                    | 1940 | PCDH9    | 5101   | Biotin-Microarrays |
| 865. | TNPO1  | 3842  | Biotin-Microarrays           | 1941 | POU6F1   | 5463   | Biotin-Microarrays |
| 866. | YTHDC1 | 91746 | Biotin-Microarrays           | 1942 | MAP7D2   | 256714 | CLEAR-CLIP         |
| 867. | HAL    | 3034  | Biotin-Microarrays           | 1943 | SS18L1   | 26039  | Biotin-Microarrays |
| 868. | APLP2  | 334   | Biotin-Microarrays           | 1944 | SNN      | 8303   | Biotin-Microarrays |
| 869. | EIF3I  | 8668  | HITS-CLIP                    | 1945 | NELL2    | 4753   | Biotin-Microarrays |
| 870. | NCOA1  | 8648  | Biotin-Microarrays           | 1946 | ZBTB40   | 9923   | Biotin-Microarrays |
| 871. | ATRX   | 546   | Biotin-Microarrays           | 1947 | FAM110C  | 642273 | Biotin-Microarrays |
| 872. | MECOM  | 2122  | Biotin-Microarrays           | 1948 | SUMO3    | 6612   | Microarrays        |
| 873. | SEH1L  | 81929 | Microarrays                  | 1949 | JAG2     | 3714   | Biotin-Microarrays |
| 874. | WDR47  | 22911 | Microarrays                  | 1950 | MUC6     | 4588   | HITS-CLIP          |
| 875. | ABCB1  | 5243  | Biotin-Microarrays           | 1951 | FAF1     | 11124  | Biotin-Microarrays |
| 876. | ZNF213 | 7760  | PAR-CLIP, Biotin-Microarrays | 1952 | PRPF39   | 55015  | Biotin-Microarrays |
| 877. | CTTN   | 2017  | Biotin-Microarrays           | 1953 | UBALD2   | 283991 | Biotin-Microarrays |
| 878. | DNAJA1 | 3301  | HITS-CLIP                    | 1954 | ARL15    | 54622  | Biotin-Microarrays |
| 879. | SNX10  | 29887 | Microarrays                  | 1955 | CDK10    | 8558   | Biotin-Microarrays |
| 880. | RBM22  | 55696 | Biotin-Microarrays           | 1956 | SP140L   | 93349  | Biotin-Microarrays |
| 881. | ZFAND6 | 54469 | Biotin-Microarrays           | 1957 | METTL7A  | 25840  | Biotin-Microarrays |
| 882. | PPEF1  | 5475  | Biotin-Microarrays           | 1958 | IFNLR1   | 163702 | Biotin-Microarrays |
| 883. | HUWE1  | 10075 | CLEAR-CLIP                   | 1959 | LMLN     | 89782  | Microarrays        |
| 884. | PIGS   | 94005 | Microarrays                  | 1960 | BRWD1    | 54014  | Biotin-Microarrays |
| 885. | SF3B2  | 10992 | Biotin-Microarrays           | 1961 | MYBL1    | 4603   | Microarrays        |



|      |               |        |                    |      |          |        |                                     |
|------|---------------|--------|--------------------|------|----------|--------|-------------------------------------|
| 886. | KLHL42        | 57542  | Biotin-Microarrays | 1962 | ADARB2   | 105    | Biotin-Microarrays                  |
| 887. | GNAS          | 2778   | Biotin-Microarrays | 1963 | IFIT1    | 3434   | Microarrays                         |
| 888. | CNOT3         | 4849   | Biotin-Microarrays | 1964 | ARL17A   | 51326  | Biotin-Microarrays                  |
| 889. | DOCK9         | 23348  | Biotin-Microarrays | 1965 | RNPC3    | 55599  | Biotin-Microarrays                  |
| 890. | TGDS          | 23483  | Biotin-Microarrays | 1966 | CCDC84   | 338657 | Biotin-Microarrays                  |
| 891. | COQ9          | 57017  | Biotin-Microarrays | 1967 | TOR3A    | 64222  | Biotin-Microarrays,<br>Microarrays  |
| 892. | KIZ           | 55857  | Biotin-Microarrays | 1968 | PPP1CC   | 5501   | Microarrays                         |
| 893. | ANAPC5        | 51433  | Biotin-Microarrays | 1969 | GLDN     | 342035 | Biotin-Microarrays                  |
| 894. | SIRT4         | 23409  | Biotin-Microarrays | 1970 | PCLO     | 27445  | Biotin-Microarrays                  |
| 895. | FUS           | 2521   | Biotin-Microarrays | 1971 | INSIG1   | 3638   | HITS-CLIP                           |
| 896. | RBM41         | 55285  | Biotin-Microarrays | 1972 | LYRM7    | 90624  | Microarrays                         |
| 897. | OTUB2         | 78990  | Biotin-Microarrays | 1973 | TMEM216  | 51259  | Biotin-Microarrays,<br>Microarrays  |
| 898. | NECAP1        | 25977  | Microarrays        | 1974 | TEAD1    | 7003   | Biotin-Microarrays,<br>Microarrays  |
| 899. | GPATCH2<br>L  | 55668  | Biotin-Microarrays | 1975 | FNBP1    | 23048  | Biotin-Microarrays                  |
| 900. | IRAK3         | 11213  | Biotin-Microarrays | 1976 | TAF9B    | 51616  | Biotin-Microarrays                  |
| 901. | SPG21         | 51324  | Biotin-Microarrays | 1977 | PTMA     | 5757   | Biotin-Microarrays                  |
| 902. | RAB11FIP<br>3 | 9727   | Biotin-Microarrays | 1978 | FANCA    | 2175   | Biotin-Microarrays                  |
| 903. | GLG1          | 2734   | Biotin-Microarrays | 1979 | SECISBP2 | 79048  | Biotin-Microarrays                  |
| 904. | RBM27         | 54439  | Biotin-Microarrays | 1980 | SEMA4D   | 10507  | Microarrays, Biotin-<br>Microarrays |
| 905. | OSBPL8        | 114882 | Microarrays        | 1981 | FANCM    | 57697  | Biotin-Microarrays                  |
| 906. | LAMB1         | 3912   | Biotin-Microarrays | 1982 | ZNF70    | 7621   | Biotin-Microarrays                  |
| 907. | CDV3          | 55573  | Biotin-Microarrays | 1983 | CARD9    | 64170  | Biotin-Microarrays                  |
| 908. | SCFD1         | 23256  | Biotin-Microarrays | 1984 | DMBT1    | 1755   | Microarrays                         |
| 909. | HNRNPC        | 3183   | Biotin-Microarrays | 1985 | AGRN     | 375790 | Biotin-Microarrays                  |
| 910. | GPATCH2       | 55105  | Biotin-Microarrays | 1986 | ZC3H6    | 376940 | Biotin-Microarrays                  |
| 911. | SEC22C        | 9117   | PAR-CLIP           | 1987 | DCUN1D3  | 123879 | Microarrays                         |
| 912. | CBX5          | 23468  | Biotin-Microarrays | 1988 | AGAP4    | 119016 | Biotin-Microarrays                  |
| 913. | TMEM38<br>B   | 55151  | Microarrays        | 1989 | ZP3      | 7784   | Microarrays                         |

|      |         |        |                               |      |          |        |                                    |
|------|---------|--------|-------------------------------|------|----------|--------|------------------------------------|
| 914. | PTGS1   | 5742   | Biotin-Microarrays            | 1990 | C19orf54 | 284325 | Biotin-Microarrays                 |
| 915. | CWF19L1 | 55280  | Microarrays                   | 1991 | NBR1     | 4077   | Biotin-Microarrays                 |
| 916. | FKBP5   | 2289   | Microarrays                   | 1992 | RALGAPA2 | 57186  | Biotin-Microarrays                 |
| 917. | EFHC1   | 114327 | Biotin-Microarrays            | 1993 | FAM221A  | 340277 | Biotin-Microarrays                 |
| 918. | JAK2    | 3717   | Biotin-Microarrays            | 1994 | TMEM201  | 199953 | Biotin-Microarrays                 |
| 919. | RAB18   | 22931  | Biotin-Microarrays            | 1995 | ZDHHC11  | 79844  | Biotin-Microarrays                 |
| 920. | PRTFDC1 | 56952  | Microarrays                   | 1996 | RPL14    | 9045   | Biotin-Microarrays                 |
| 921. | HNRNPM  | 4670   | Biotin-Microarrays            | 1997 | TRMT2B   | 79979  | Microarrays                        |
| 922. | MKNK2   | 2872   | Biotin-Microarrays            | 1998 | ZNF292   | 23036  | Biotin-Microarrays                 |
| 923. | SLC35E4 | 339665 | PAR-CLIP                      | 1999 | ZNF567   | 163081 | Biotin-Microarrays                 |
| 924. | MFNG    | 4242   | Biotin-Microarrays            | 2000 | ARID2    | 196528 | Biotin-Microarrays                 |
| 925. | GGA1    | 26088  | Biotin-Microarrays            | 2001 | TMEM63A  | 9725   | Biotin-Microarrays                 |
| 926. | HIRA    | 7290   | Microarrays                   | 2002 | ZNF107   | 51427  | Biotin-Microarrays                 |
| 927. | HPS4    | 89781  | Biotin-Microarrays            | 2003 | ZNF493   | 284443 | Biotin-Microarrays                 |
| 928. | DDX17   | 10521  | Biotin-Microarrays            | 2004 | EPHB4    | 2050   | Biotin-Microarrays                 |
| 929. | CBY1    | 25776  | Microarrays                   | 2005 | ZNF124   | 7678   | Biotin-Microarrays                 |
| 930. | RHBDD3  | 25807  | Biotin-Microarrays            | 2006 | TSC22D2  | 9819   | Biotin-Microarrays                 |
| 931. | CHKB    | 1120   | Biotin-Microarrays            | 2007 | NCOR2    | 9612   | Biotin-Microarrays                 |
| 932. | MTMR3   | 8897   | Biotin-Microarrays            | 2008 | LAMA2    | 3908   | Microarrays                        |
| 933. | PNPLA3  | 80339  | Biotin-Microarrays            | 2009 | XRCC2    | 7516   | Biotin-Microarrays                 |
| 934. | TNRC6B  | 23112  | Biotin-Microarrays            | 2010 | SLC22A25 | 387601 | Biotin-Microarrays                 |
| 935. | IFT27   | 11020  | Biotin-Microarrays            | 2011 | RABL6    | 55684  | Biotin-Microarrays                 |
| 936. | ZC3H7B  | 23264  | Biotin-Microarrays            | 2012 | TRAPPC4  | 51399  | Microarrays                        |
| 937. | BRD1    | 23774  | Biotin-Microarrays            | 2013 | AMZ2     | 51321  | Microarrays                        |
| 938. | SOS2    | 6655   | Biotin-Microarrays            | 2014 | NF1      | 4763   | Biotin-Microarrays                 |
| 939. | SNW1    | 22938  | Biotin-Microarrays            | 2015 | COL27A1  | 85301  | Biotin-Microarrays                 |
| 940. | DICER1  | 23405  | Biotin-Microarrays            | 2016 | ZNF700   | 90592  | Biotin-Microarrays                 |
| 941. | PAPLN   | 89932  | Biotin-Microarrays            | 2017 | MVB12B   | 89853  | Biotin-Microarrays                 |
| 942. | NFKBIA  | 4792   | Biotin-Microarrays            | 2018 | ANKRD36B | 57730  | Biotin-Microarrays                 |
| 943. | MYBL2   | 4605   | Microarrays                   | 2019 | ARHGEF12 | 23365  | Biotin-Microarrays                 |
| 944. | NDRG3   | 57446  | Microarrays                   | 2020 | SRGAP1   | 57522  | Biotin-Microarrays                 |
| 945. | PABPC1L | 80336  | HITS-CLIP, Biotin-Microarrays | 2021 | FAM3C    | 10447  | Microarrays                        |
| 946. | STK4    | 6789   | Biotin-Microarrays            | 2022 | CASP4    | 837    | Biotin-Microarrays,<br>Microarrays |

|      |         |       |                                    |      |         |           |                              |
|------|---------|-------|------------------------------------|------|---------|-----------|------------------------------|
| 947. | RNF24   | 11237 | HITS-CLIP                          | 2023 | ZNF100  | 163227    | Biotin-Microarrays           |
| 948. | PLCB4   | 5332  | Biotin-Microarrays                 | 2024 | PCBP2   | 5094      | Biotin-Microarrays           |
| 949. | TM9SF4  | 9777  | Biotin-Microarrays                 | 2025 | PGAP1   | 80055     | Biotin-Microarrays           |
| 950. | NOP56   | 10528 | Biotin-Microarrays                 | 2026 | NOL4L   | 140688    | Biotin-Microarrays, PAR-CLIP |
| 951. | TTI1    | 9675  | Biotin-Microarrays                 | 2027 | SLC2A7  | 155184    | CLEAR-CLIP                   |
| 952. | E2F1    | 1869  | qPCR, Western Blot                 | 2028 | ZNF165  | 7718      | Biotin-Microarrays           |
| 953. | TNNC2   | 7125  | Microarrays                        | 2029 | PELI1   | 57162     | Biotin-Microarrays, PAR-CLIP |
| 954. | SMCHD1  | 23347 | Biotin-Microarrays                 | 2030 | ZNF675  | 171392    | Biotin-Microarrays           |
| 955. | RIOK3   | 8780  | Biotin-Microarrays                 | 2031 | DIO3    | 1735      | Microarrays                  |
| 956. | MID1    | 4281  | Biotin-Microarrays                 | 2032 | IPP     | 3652      | Biotin-Microarrays           |
| 957. | MOSPD1  | 56180 | Microarrays                        | 2033 | SPN     | 6693      | Biotin-Microarrays           |
| 958. | CCDC22  | 28952 | Biotin-Microarrays                 | 2034 | MIB2    | 142678    | Biotin-Microarrays           |
| 959. | GABRE   | 2564  | Biotin-Microarrays                 | 2035 | RAB40C  | 57799     | Biotin-Microarrays           |
| 960. | SYTL4   | 94121 | Biotin-Microarrays                 | 2036 | PARVA   | 55742     | Biotin-Microarrays           |
| 961. | CENPI   | 2491  | Biotin-Microarrays                 | 2037 | CCDC180 | 100499483 | Biotin-Microarrays           |
| 962. | FNDC3A  | 22862 | Microarrays                        | 2038 | ZNF44   | 51710     | Biotin-Microarrays           |
| 963. | CDADC1  | 81602 | CLEAR-CLIP                         | 2039 | NKIRAS1 | 28512     | Microarrays                  |
| 964. | STK24   | 8428  | Microarrays                        | 2040 | SPG7    | 6687      | Biotin-Microarrays           |
| 965. | ARHGEF7 | 8874  | Biotin-Microarrays                 | 2041 | MPZL1   | 9019      | Biotin-Microarrays           |
| 966. | SUPT20H | 55578 | Biotin-Microarrays                 | 2042 | SNHG12  | 85028     | Biotin-Microarrays           |
| 967. | MRPS31  | 10240 | Biotin-Microarrays                 | 2043 | TUBA3C  | 7278      | Microarrays                  |
| 968. | FLT1    | 2321  | Biotin-Microarrays                 | 2044 | ZNF273  | 10793     | Biotin-Microarrays           |
| 969. | VWA8    | 23078 | Biotin-Microarrays                 | 2045 | NUP62CL | 54830     | Microarrays                  |
| 970. | MSLN    | 10232 | Biotin-Microarrays                 | 2046 | SFI1    | 9814      | Biotin-Microarrays           |
| 971. | NFAT5   | 10725 | Biotin-Microarrays,<br>Microarrays | 2047 | ZNF583  | 147949    | Microarrays                  |
| 972. | LONP2   | 83752 | Biotin-Microarrays                 | 2048 | ZNF28   | 7576      | Biotin-Microarrays           |
| 973. | ARL2BP  | 23568 | Microarrays                        | 2049 | KCNRG   | 283518    | Biotin-Microarrays           |
| 974. | DHODH   | 1723  | Biotin-Microarrays                 | 2050 | STK39   | 27347     | Microarrays                  |
| 975. | PSMD7   | 5713  | Biotin-Microarrays                 | 2051 | SLC5A3  | 6526      | Biotin-Microarrays           |
| 976. | SETD6   | 79918 | Biotin-Microarrays                 | 2052 | CNOT7   | 29883     | Biotin-Microarrays           |
| 977. | MLYCD   | 23417 | CLEAR-CLIP                         | 2053 | MTOR    | 2475      | qPCR, Western Blot           |
| 978. | TAF1C   | 9013  | Biotin-Microarrays                 | 2054 | PNP     | 4860      | PAR-CLIP                     |
| 979. | ZNF500  | 26048 | Biotin-Microarrays                 | 2055 | SFT2D1  | 113402    | Microarrays                  |

|       |               |        |                                    |      |          |           |                    |
|-------|---------------|--------|------------------------------------|------|----------|-----------|--------------------|
| 980.  | MTHFSD        | 64779  | Biotin-Microarrays                 | 2056 | ZNF277   | 11179     | Biotin-Microarrays |
| 981.  | UBE2I         | 7329   | Biotin-Microarrays                 | 2057 | LTN1     | 26046     | Biotin-Microarrays |
| 982.  | PIEZO1        | 9780   | Biotin-Microarrays                 | 2058 | CCDC152  | 100129792 | Biotin-Microarrays |
| 983.  | GSPT1         | 2935   | Biotin-Microarrays                 | 2059 | SMC5     | 23137     | Biotin-Microarrays |
| 984.  | USP31         | 57478  | Biotin-Microarrays                 | 2060 | L1CAM    | 3897      | Biotin-Microarrays |
| 985.  | TOX3          | 27324  | PAR-CLIP                           | 2061 | SREBF2   | 6721      | Biotin-Microarrays |
| 986.  | TMC5          | 79838  | Biotin-Microarrays                 | 2062 | RPL39    | 6170      | Biotin-Microarrays |
| 987.  | KNOP1         | 400506 | Biotin-Microarrays                 | 2063 | ATG9A    | 79065     | HITS-CLIP          |
| 988.  | TMEM87<br>A   | 25963  | Microarrays                        | 2064 | NOS1AP   | 9722      | Biotin-Microarrays |
| 989.  | CEP152        | 22995  | Biotin-Microarrays                 | 2065 | DMD      | 1756      | Biotin-Microarrays |
| 990.  | DTWD1         | 56986  | Biotin-Microarrays                 | 2066 | RORB     | 6096      | Biotin-Microarrays |
| 991.  | CSPP1         | 79848  | Biotin-Microarrays                 | 2067 | SNHG5    | 387066    | Biotin-Microarrays |
| 992.  | FZD3          | 7976   | PAR-CLIP                           | 2068 | GIGYF2   | 26058     | Biotin-Microarrays |
| 993.  | PLAT          | 5327   | Biotin-Microarrays,<br>Microarrays | 2069 | RUFY2    | 55680     | Biotin-Microarrays |
| 994.  | TRPS1         | 7227   | Biotin-Microarrays, PAR-CLIP       | 2070 | BRD2     | 6046      | Biotin-Microarrays |
| 995.  | INTS10        | 55174  | Biotin-Microarrays                 | 2071 | PBX2     | 5089      | Microarrays        |
| 996.  | MTMR9         | 66036  | Biotin-Microarrays                 | 2072 | MRPL38   | 64978     | Biotin-Microarrays |
| 997.  | TNFRSF1<br>0A | 8797   | Biotin-Microarrays                 | 2073 | GPANK1   | 7918      | Biotin-Microarrays |
| 998.  | ERICH1        | 157697 | Biotin-Microarrays                 | 2074 | ZNF805   | 390980    | Biotin-Microarrays |
| 999.  | ARHGEF1<br>0  | 9639   | Biotin-Microarrays                 | 2075 | TCTN1    | 79600     | Biotin-Microarrays |
| 1000. | KLHDC4        | 54758  | Biotin-Microarrays                 | 2076 | PRSS1    | 5644      | Biotin-Microarrays |
| 1001. | MCM4          | 4173   | Microarrays                        | 2077 | SPIRE2   | 84501     | Biotin-Microarrays |
| 1002. | ASAH1         | 427    | Microarrays                        | 2078 | VIT      | 5212      | Microarrays        |
| 1003. | MAN2B1        | 4125   | Biotin-Microarrays                 | 2079 | E2F4     | 1874      | PAR-CLIP           |
| 1004. | HNRNPL        | 3191   | Biotin-Microarrays                 | 2080 | PDE7A    | 5150      | Biotin-Microarrays |
| 1005. | DOT1L         | 84444  | Biotin-Microarrays                 | 2081 | IPO7     | 10527     | Microarrays        |
| 1006. | MED26         | 9441   | Biotin-Microarrays                 | 2082 | TMEM256  | 254863    | Biotin-Microarrays |
| 1007. | CCNE1         | 898    | Biotin-Microarrays                 | 2083 | ITPRIPL2 | 162073    | Biotin-Microarrays |
| 1008. | URI1          | 8725   | Biotin-Microarrays                 | 2084 | CRYZL1   | 9946      | Biotin-Microarrays |
| 1009. | BCAT2         | 587    | Microarrays                        | 2085 | RAB12    | 201475    | Biotin-Microarrays |
| 1010. | MIER2         | 54531  | Biotin-Microarrays                 | 2086 | ANKRD28  | 23243     | Biotin-Microarrays |

|       |              |       |                                                  |      |           |        |                                    |
|-------|--------------|-------|--------------------------------------------------|------|-----------|--------|------------------------------------|
| 1011. | TNPO2        | 30000 | Biotin-Microarrays                               | 2087 | ZNF580    | 51157  | Biotin-Microarrays                 |
| 1012. | CACNG7       | 59284 | Biotin-Microarrays                               | 2088 | ZNF611    | 81856  | Biotin-Microarrays                 |
| 1013. | PDE4C        | 5143  | Biotin-Microarrays                               | 2089 | DENND1B   | 163486 | Biotin-Microarrays                 |
| 1014. | SCN1B        | 6324  | Biotin-Microarrays                               | 2090 | ZNF254    | 9534   | Biotin-Microarrays                 |
| 1015. | ZNF85        | 7639  | Biotin-Microarrays                               | 2091 | GSTM2     | 2946   | Microarrays                        |
| 1016. | AVL9         | 23080 | Biotin-Microarrays                               | 2092 | DNASE1    | 1773   | Biotin-Microarrays                 |
| 1017. | CFAP69       | 79846 | Biotin-Microarrays                               | 2093 | IRF9      | 10379  | HITS-CLIP                          |
| 1018. | PIK3CG       | 5294  | Luciferase Reporter Assay,<br>qPCR, Western Blot | 2094 | IRF9      | 10379  | Microarrays                        |
| 1019. | PON2         | 5445  | Biotin-Microarrays,<br>Microarrays               | 2095 | TAX1BP3   | 30851  | Microarrays                        |
| 1020. | ITGB8        | 3696  | Biotin-Microarrays                               | 2096 | GANC      | 2595   | Biotin-Microarrays                 |
| 1021. | SSBP1        | 6742  | Biotin-Microarrays                               | 2097 | TTLL3     | 26140  | Biotin-Microarrays                 |
| 1022. | GRB10        | 2887  | Microarrays                                      | 2098 | C3orf56   | 285311 | Biotin-Microarrays                 |
| 1023. | ABHD11       | 83451 | Biotin-Microarrays                               | 2099 | MIR99AHG  | 388815 | Microarrays                        |
| 1024. | PTCD1        | 26024 | Biotin-Microarrays                               | 2100 | PPP3R1    | 5534   | Microarrays                        |
| 1025. | ZKSCAN1      | 7586  | PAR-CLIP                                         | 2101 | PPP2R2A   | 5520   | Biotin-Microarrays, CLEAR-<br>CLIP |
| 1026. | EIF3B        | 8662  | Biotin-Microarrays                               | 2102 | CCNL2     | 81669  | Biotin-Microarrays                 |
| 1027. | USP42        | 84132 | PAR-CLIP, Biotin-Microarrays                     | 2103 | EXOSC6    | 118460 | Biotin-Microarrays                 |
| 1028. | COA1         | 55744 | Biotin-Microarrays                               | 2104 | SLC26A6   | 65010  | Biotin-Microarrays                 |
| 1029. | URGCP        | 55665 | Biotin-Microarrays                               | 2105 | RUSC1-AS1 | 284618 | Biotin-Microarrays                 |
| 1030. | PRKAG2       | 51422 | Biotin-Microarrays                               | 2106 | TEX41     | 401014 | Biotin-Microarrays                 |
| 1031. | LIMK1        | 3984  | Microarrays                                      | 2107 | SAPCD1    | 401251 | Biotin-Microarrays                 |
| 1032. | TGFBR1       | 7046  | Biotin-Microarrays                               | 2108 | TMA7      | 51372  | Biotin-Microarrays                 |
| 1033. | SEC61B       | 10952 | Biotin-Microarrays                               | 2109 | PPP1R3E   | 90673  | Biotin-Microarrays                 |
| 1034. | RLN1         | 6013  | Microarrays                                      | 2110 | OR10G9    | 219870 | CLEAR-CLIP                         |
| 1035. | RIC1         | 57589 | HITS-CLIP                                        | 2111 | LRRC37A2  | 474170 | Biotin-Microarrays                 |
| 1036. | EIF3A        | 8661  | HITS-CLIP                                        | 2112 | CDRT4     | 284040 | Biotin-Microarrays                 |
| 1037. | DDX50        | 79009 | Biotin-Microarrays                               | 2113 | NSUN6     | 221078 | Biotin-Microarrays                 |
| 1038. | LZTS2        | 84445 | Biotin-Microarrays                               | 2114 | CRCP      | 27297  | Biotin-Microarrays                 |
| 1039. | SFXN3        | 81855 | Biotin-Microarrays                               | 2115 | MICAL3    | 57553  | Biotin-Microarrays                 |
| 1040. | TNKS2        | 80351 | Biotin-Microarrays                               | 2116 | RBM12     | 10137  | Microarrays                        |
| 1041. | ARHGAP<br>21 | 57584 | Biotin-Microarrays                               | 2117 | N4BP2L2   | 10443  | Biotin-Microarrays                 |

|       |         |        |                                            |      |           |           |                    |
|-------|---------|--------|--------------------------------------------|------|-----------|-----------|--------------------|
| 1042. | CPEB3   | 22849  | Microarrays                                | 2118 | NEAT1     | 283131    | Biotin-Microarrays |
| 1043. | SMC3    | 9126   | Biotin-Microarrays                         | 2119 | PDCD6     | 10016     | Biotin-Microarrays |
| 1044. | GIT1    | 28964  | HITS-CLIP, Biotin-Microarrays, Microarrays | 2120 | CDK3      | 1018      | Biotin-Microarrays |
| 1045. | RPS6KB1 | 6198   | qPCR, Western Blot                         | 2121 | PRKDC     | 5591      | CLEAR-CLIP         |
| 1046. | HOXB6   | 3216   | Biotin-Microarrays                         | 2122 | PIGY      | 84992     | Biotin-Microarrays |
| 1047. | RAI1    | 10743  | Biotin-Microarrays                         | 2123 | EID3      | 493861    | Biotin-Microarrays |
| 1048. | MED31   | 51003  | Biotin-Microarrays                         | 2124 | POLR2M    | 81488     | Microarrays        |
| 1049. | AKAP10  | 11216  | Biotin-Microarrays                         | 2125 | ZNF10     | 7556      | Biotin-Microarrays |
| 1050. | DHX58   | 79132  | Microarrays                                | 2126 | CUX1      | 1523      | Biotin-Microarrays |
| 1051. | COL1A1  | 1277   | Microarrays                                | 2127 | PRSS58    | 136541    | Biotin-Microarrays |
| 1052. | ABCC3   | 8714   | Biotin-Microarrays                         | 2128 | CEP95     | 90799     | Biotin-Microarrays |
| 1053. | LUC7L3  | 51747  | Biotin-Microarrays                         | 2129 | ANKRD20A1 | 84210     | Biotin-Microarrays |
| 1054. | PRKAR1A | 5573   | Biotin-Microarrays                         | 2130 | FLJ42627  | 645644    | Biotin-Microarrays |
| 1055. | MMD     | 23531  | Biotin-Microarrays                         | 2131 | SRSF8     | 10929     | Biotin-Microarrays |
| 1056. | OCIAD1  | 54940  | Biotin-Microarrays                         | 2132 | OTUD7B    | 56957     | Biotin-Microarrays |
| 1057. | AREG    | 374    | Microarrays                                | 2133 | RNF115    | 27246     | Biotin-Microarrays |
| 1058. | MFSD10  | 10227  | Microarrays                                | 2134 | SEC22B    | 9554      | Microarrays        |
| 1059. | GLRB    | 2743   | Biotin-Microarrays                         | 2135 | SRGAP2    | 23380     | Biotin-Microarrays |
| 1060. | RAPGEF2 | 9693   | Biotin-Microarrays                         | 2136 | POLR2J2   | 246721    | Biotin-Microarrays |
| 1061. | KLF3    | 51274  | Biotin-Microarrays                         | 2137 | ZNF224    | 7767      | Biotin-Microarrays |
| 1062. | FOLR1   | 2348   | Biotin-Microarrays                         | 2138 | NBPF12    | 149013    | Biotin-Microarrays |
| 1063. | CEP164  | 22897  | Biotin-Microarrays                         | 2139 | SLC6A14   | 11254     | Biotin-Microarrays |
| 1064. | CBL     | 867    | Biotin-Microarrays                         | 2140 | TMEM185A  | 84548     | Microarrays        |
| 1065. | PTPMT1  | 114971 | Microarrays                                | 2141 | TAF15     | 8148      | Biotin-Microarrays |
| 1066. | SOX6    | 55553  | Biotin-Microarrays                         | 2142 | NBPF10    | 100132406 | Biotin-Microarrays |
| 1067. | NDUFS8  | 4728   | Biotin-Microarrays                         | 2143 | CD24      | 100133941 | Microarrays        |
| 1068. | EXPH5   | 23086  | Biotin-Microarrays                         | 2144 | DCP1A     | 55802     | Microarrays        |
| 1069. | CAMKK2  | 10645  | Biotin-Microarrays                         | 2145 | CWC25     | 54883     | Biotin-Microarrays |
| 1070. | BCL7A   | 605    | Biotin-Microarrays                         | 2146 | ZNF280B   | 140883    | Biotin-Microarrays |
| 1071. | CDKN1B  | 1027   | PAR-CLIP, CLEAR-CLIP                       | 2147 | MLLT6     | 4302      | Biotin-Microarrays |
| 1072. | NAA25   | 80018  | Biotin-Microarrays                         | 2148 | TIMM22    | 29928     | Microarrays        |
| 1073. | SCNN1A  | 6337   | Biotin-Microarrays                         | 2149 | CISD3     | 284106    | Biotin-Microarrays |
| 1074. | IL26    | 55801  | Microarrays                                | 2150 | MYO19     | 80179     | Biotin-Microarrays |

|       |               |       |                    |      |          |        |                    |
|-------|---------------|-------|--------------------|------|----------|--------|--------------------|
| 1075. | CHD4          | 1108  | Biotin-Microarrays | 2151 | C17orf78 | 284099 | Microarrays        |
| 1076. | UHRF1BP<br>1L | 23074 | Biotin-Microarrays | 2152 | ACACA    | 31     | Biotin-Microarrays |
